# Supplementary material
Source: publisher figshare collection journal article supplement (https://acs.figshare.com/ndownloader/files/3712792)
Supplement: Supplementary file 1 [file 3712792]

## Supporting Information

# Systemic co-delivery of a homo-serine derived ceramide analog and curcumin to tumor vasculature inhibits mouse tumor growth

*Sugata Barui<sup>†Φ‡</sup>, Soumen Saha<sup>†‡‡</sup>, Venu Yakati<sup>†#</sup>, Arabinda Chaudhuri<sup>†##\*</sup>*

<sup>†</sup>Biomaterials Group, CSIR-Indian Institute of Chemical Technology, Uppal Road, Tarnaka, Hyderabad- 500007, Telangana State, India.

<sup>#</sup>Academy of Scientific & Innovative Research (AcSIR), 2 Rafi Marg, New Delhi, India.

<sup>‡</sup>Co-first authors.

\*Corresponding author: Biomaterials Group, CSIR-Indian Institute of Chemical Technology, Uppal road, Tarnaka, Hyderabad - 500007, Telangana, India.

| <b>Table of Contents:</b>                                                                                  | <b>Page</b> |
|------------------------------------------------------------------------------------------------------------|-------------|
| Figure S1-S2. <sup>1</sup> HNMR and mass Spectra for<br>RGDGWK-lipopeptide 1 and RGELFK-lipopeptide 2..... | 3-4         |
| Figures S3. HPLC chromatograms for RGDGWK-lipopeptide 1 and<br>RGELFK-lipopeptide 2.....                   | 5           |
| Figures S4- S13. <sup>1</sup> HNMR and mass Spectra for ceramide analogs.....                              | 6-15        |
| Figures S14. HPLC chromatograms for ceramide analogs .....                                                 | 15-19       |
| Table S1.Zeta size and potential.....                                                                      | 20          |
| Figure S15. Cellular uptake study .....                                                                    | 21          |
| Figure S16-S18. MTT assay.....                                                                             | 22-24       |
| Figure S19. Flow cytometric analysis of apoptosis.....                                                     | 25          |
| Figure S20. Flow cytometric cell cycle analysis.....                                                       | 26          |
| Figure S21. RT-PCR and western blot analysis.....                                                          | 27          |
| Figure S22. Biodistribution.....                                                                           | 28          |
| Figure S23. In vivo tumor regression.....                                                                  | 29          |
| Figure S24. Tumor regressing property of control liposome.....                                             | 29          |

A.

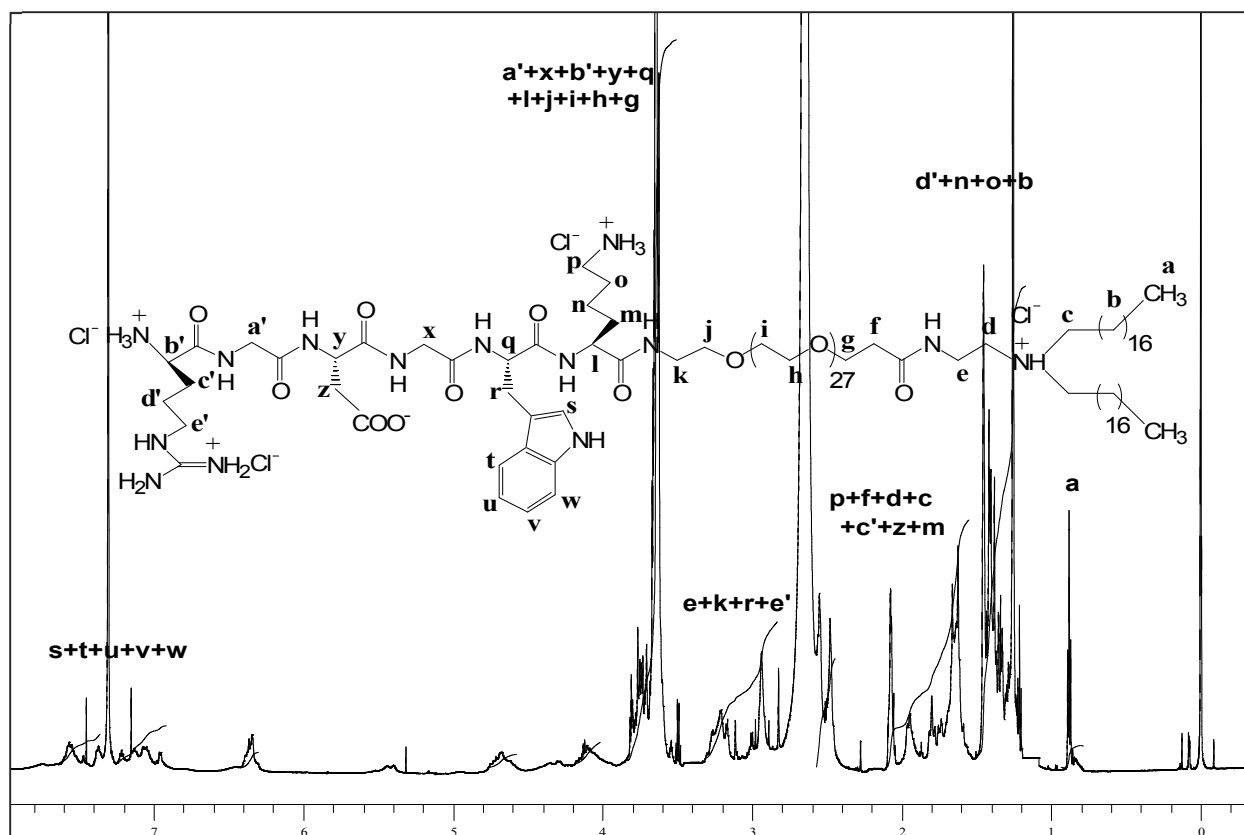

B.

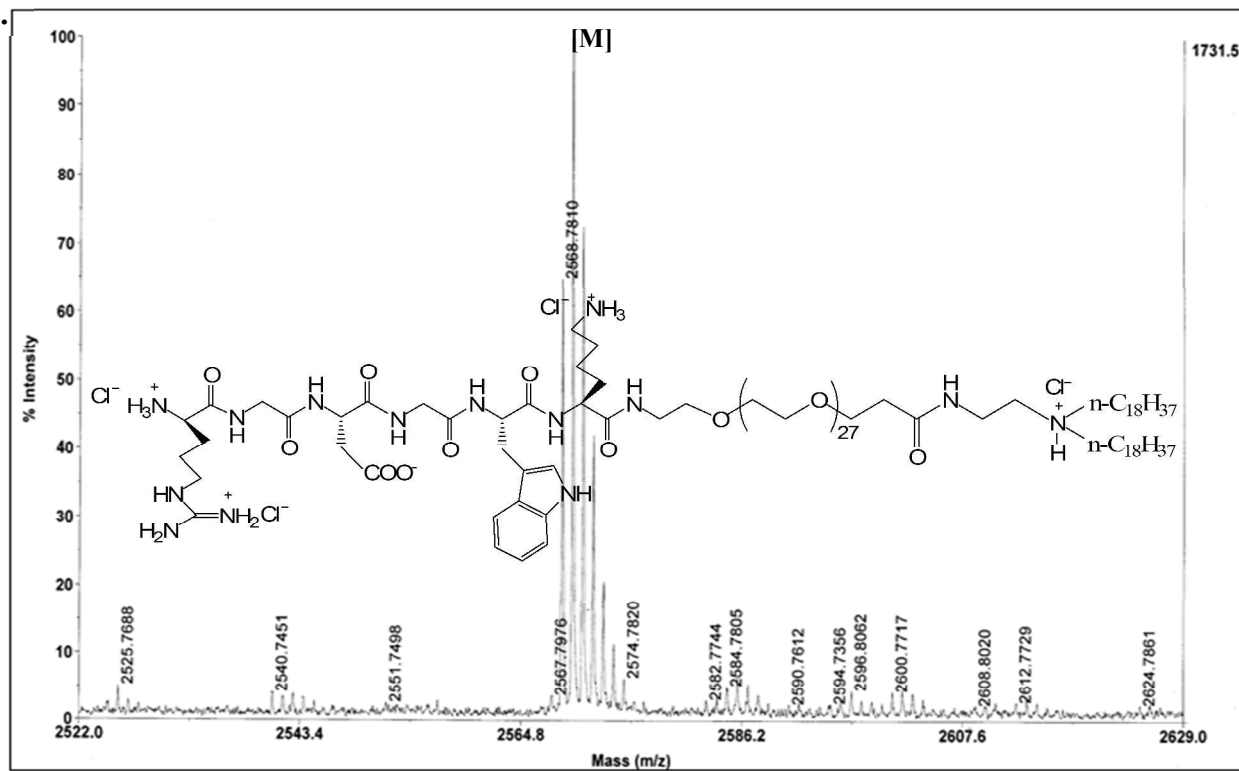

**Figure S1.** <sup>1</sup>H NMR (A) and MALDI-mass (B) of pegylated RGDGWK-lipopeptide 1.

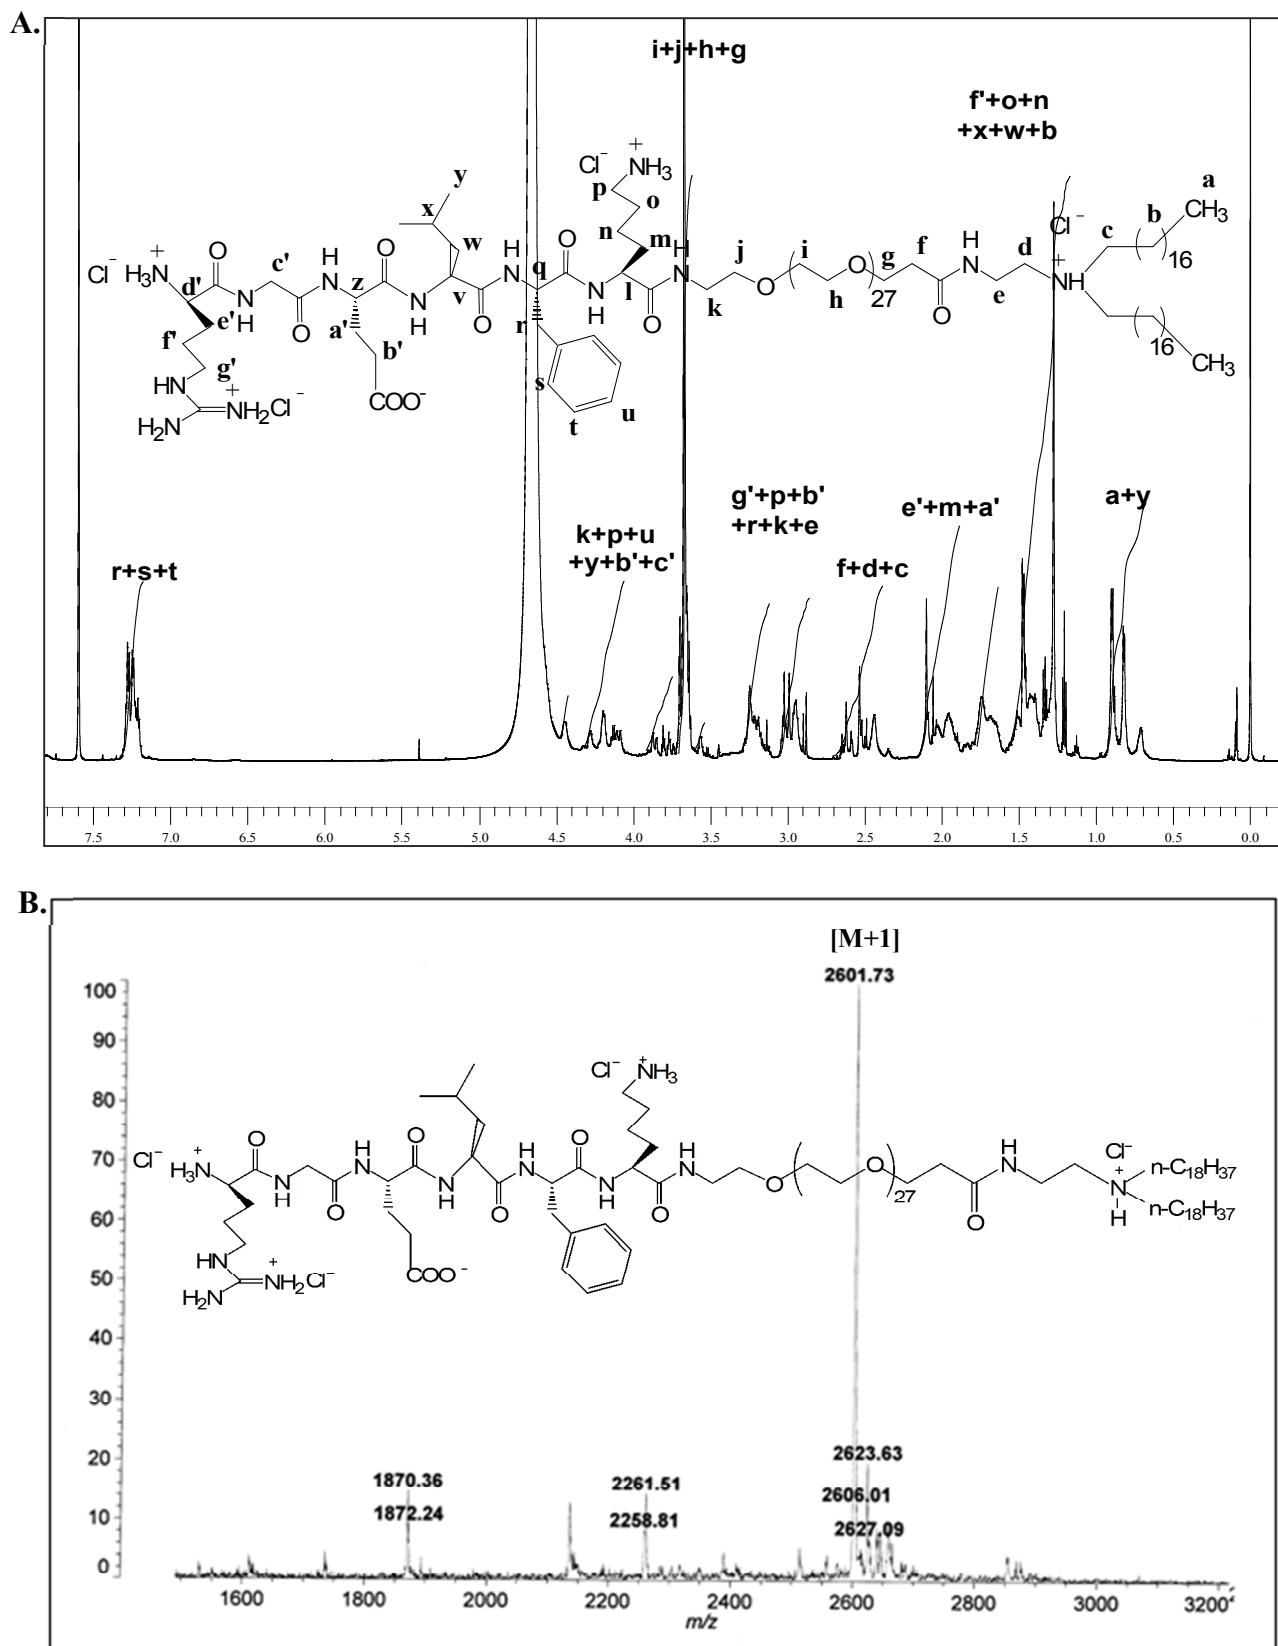

**Figure S2.**  $^1\text{H}$  NMR (**A**) and MALDI-mass (**B**) of pegylated RGELFK-lipopeptide **2**.

### HPLC Chromatogram of RGDGWK-lipopeptide **1**.

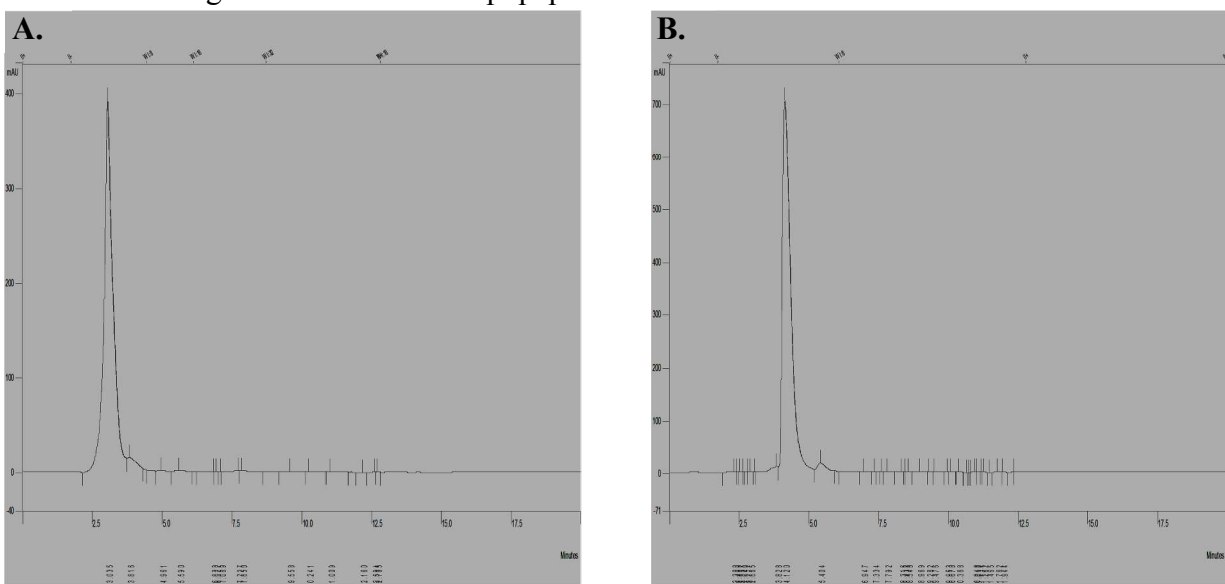

### HPLC Chromatogram of RGELFK-lipopeptide **2**.

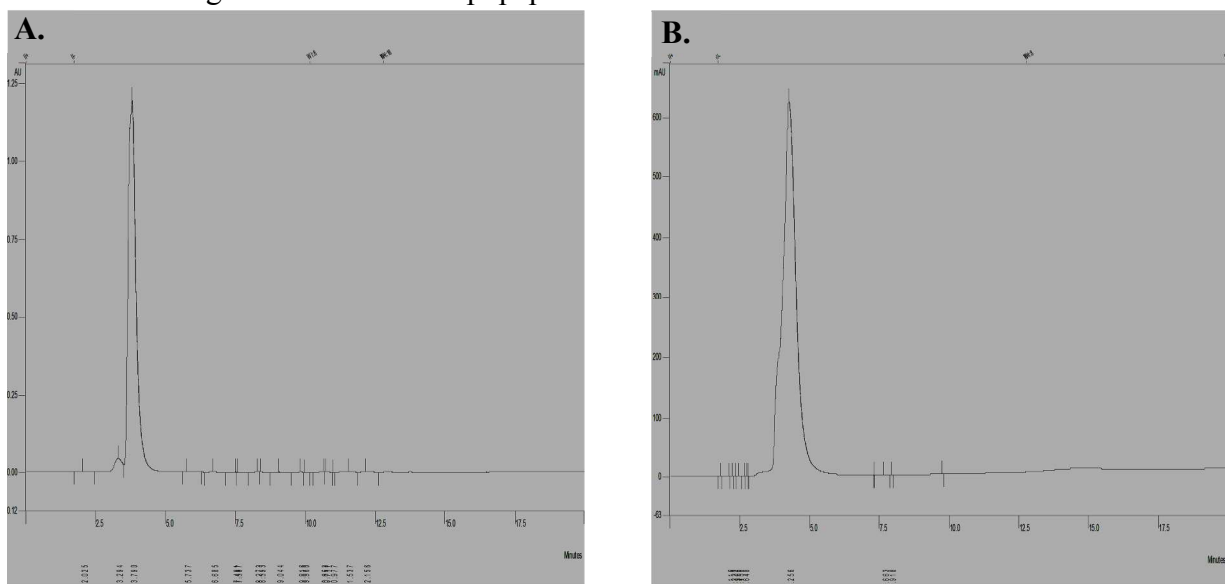

**Figure S3.** HPLC Chromatograms of pegylated RGDGWK-lipopeptide **1** & pegylated RGELFK-lipopeptide **2**. Mobile Phase: Methanol (A); Methanol:Water, 95:5, v/v, (B).

**HPLC Conditions:** System: Varian 1100 series, Column: Lichrospher® 100, RP-18e (5 µm), Flow Rate: 1.0 mL/min (0-20 min), Typical Column Pressure: 60-65 Bars, Detection: UV at 210

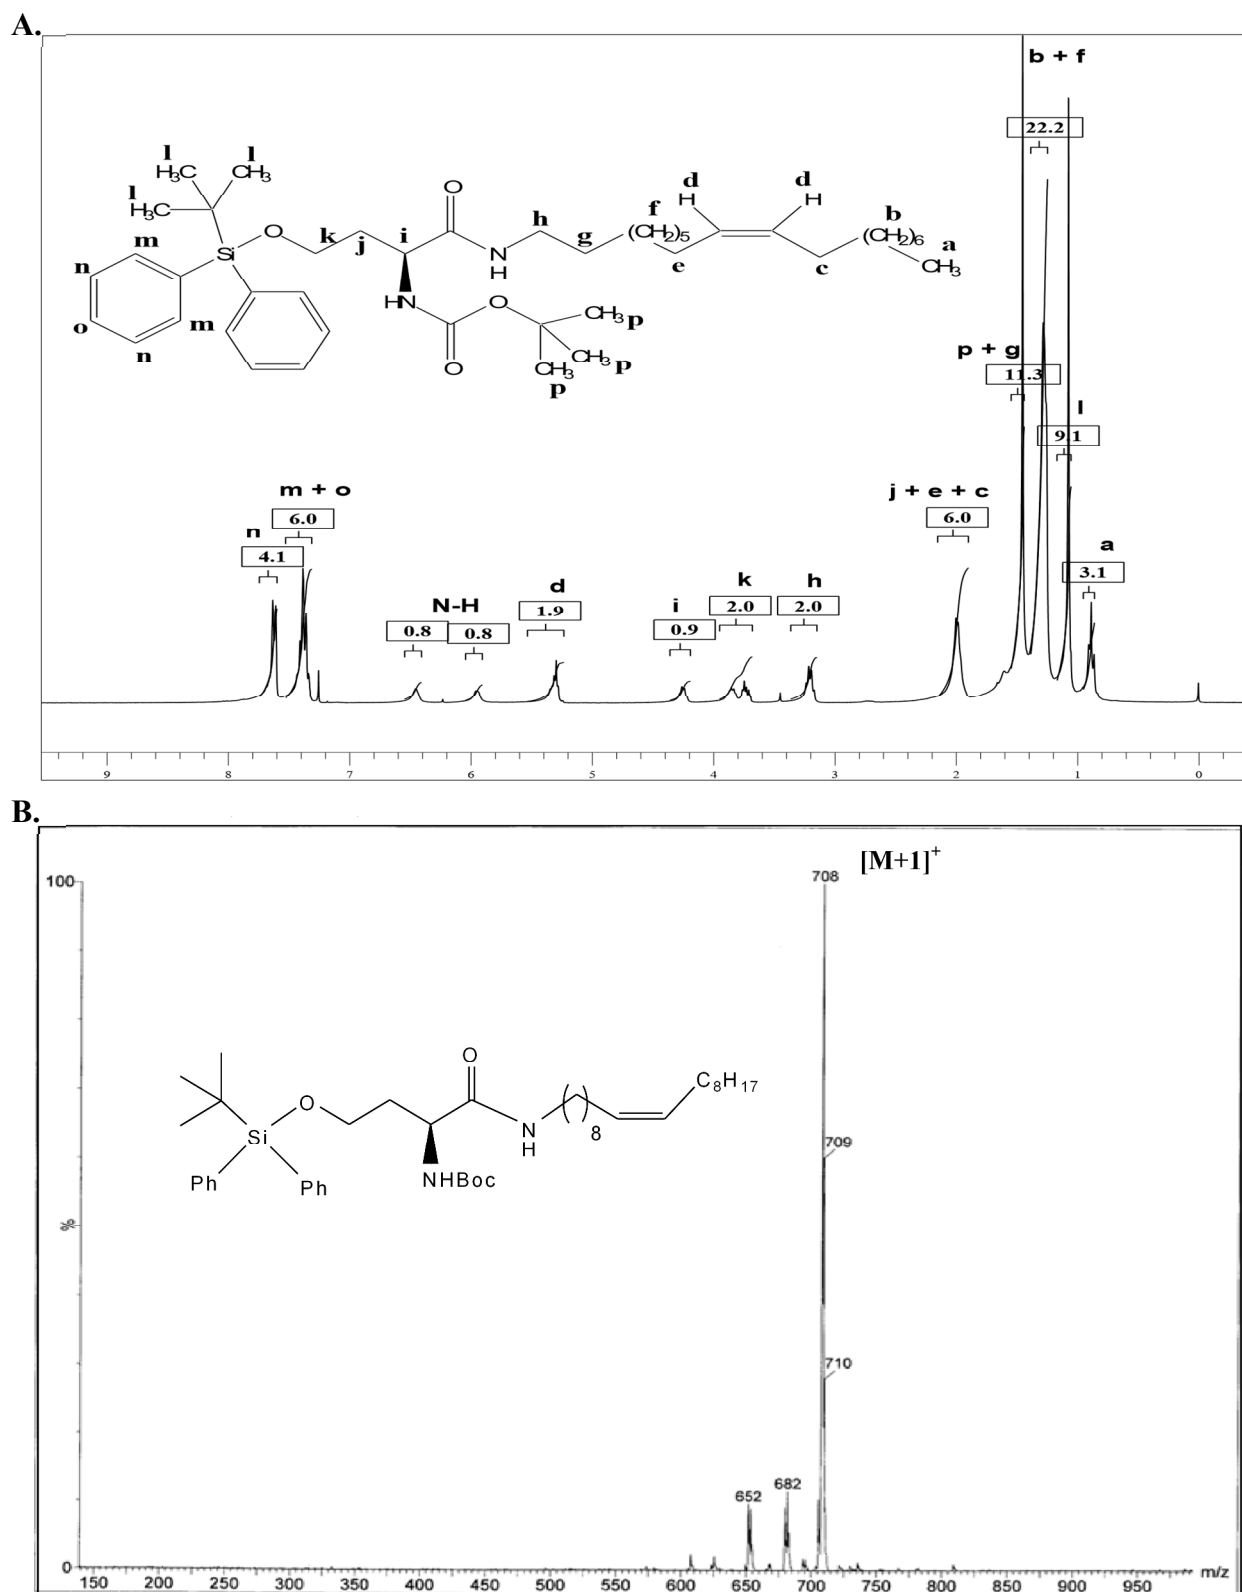

**Figure S4.**  $^1\text{H}$  NMR (**A**) and ESI-MS (**B**) of IIIb (Scheme 3).

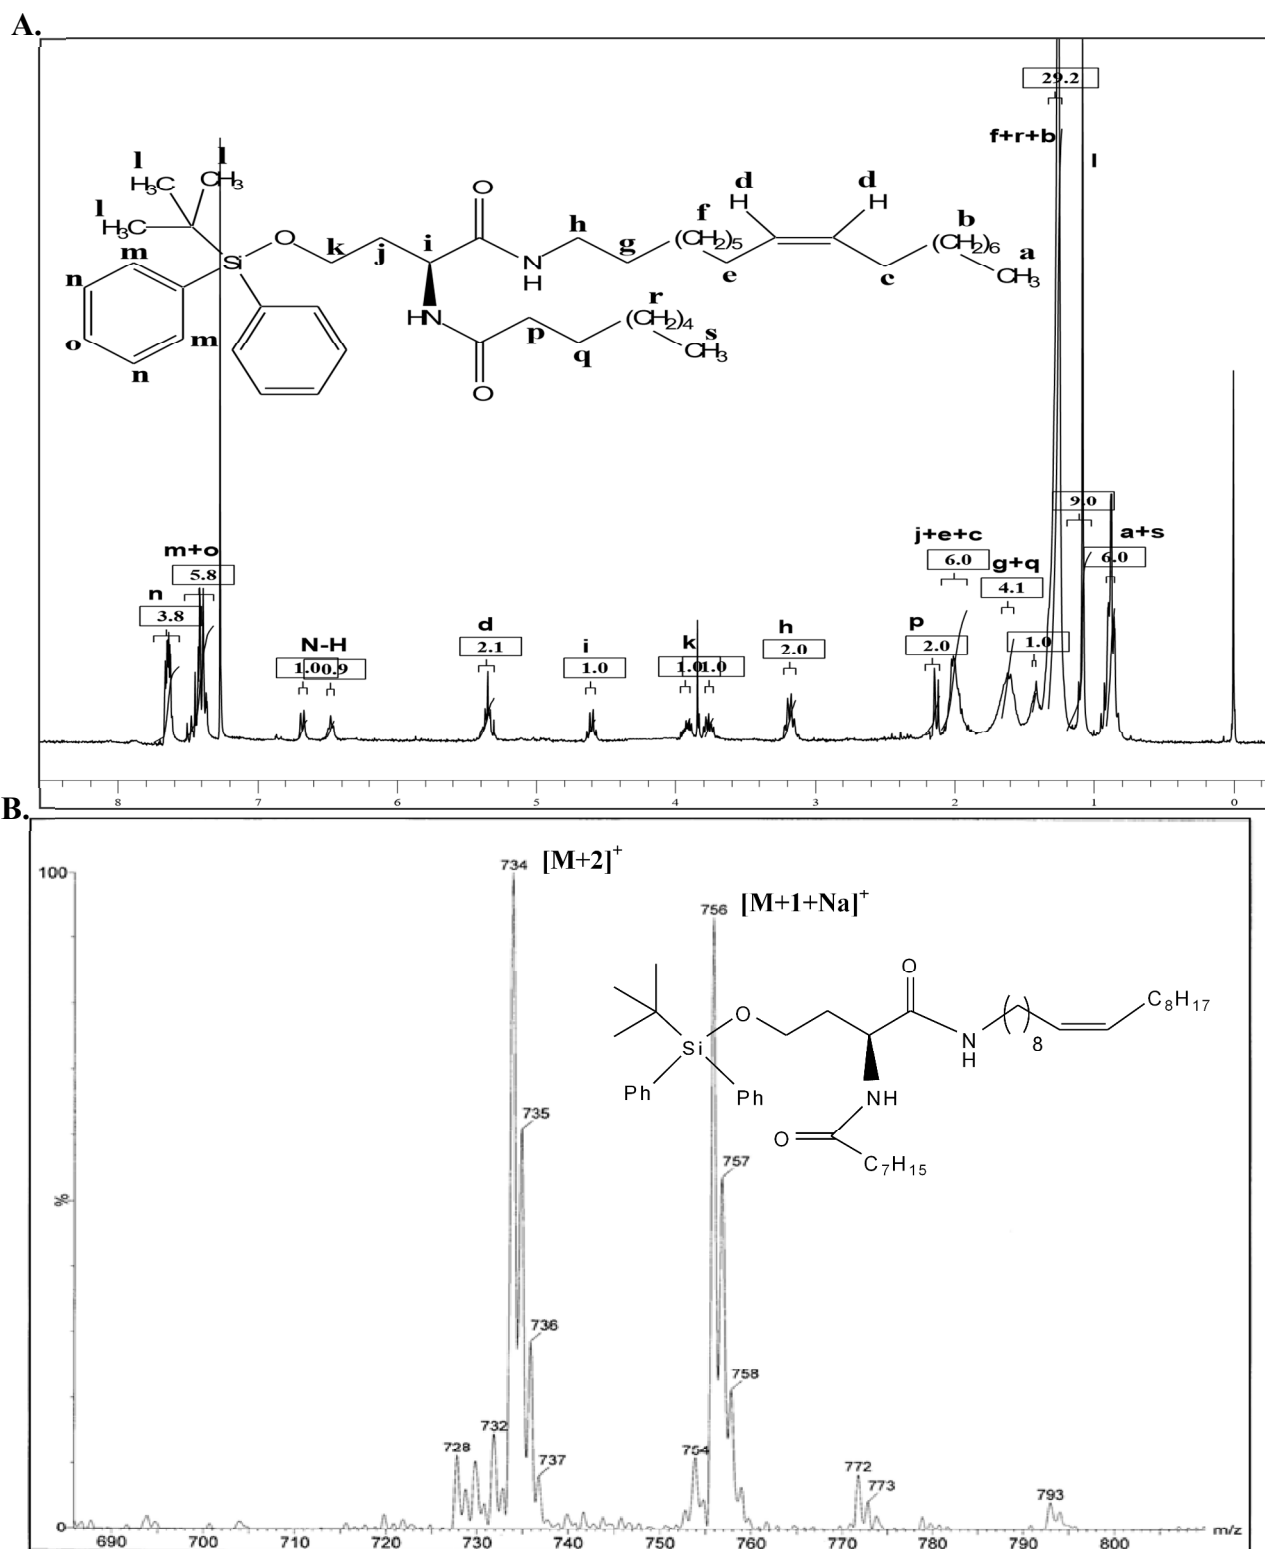

**Figure S5.**  $^1\text{H}$  NMR (**A**) and ESI-MS (**B**) of IVb (Scheme 3).

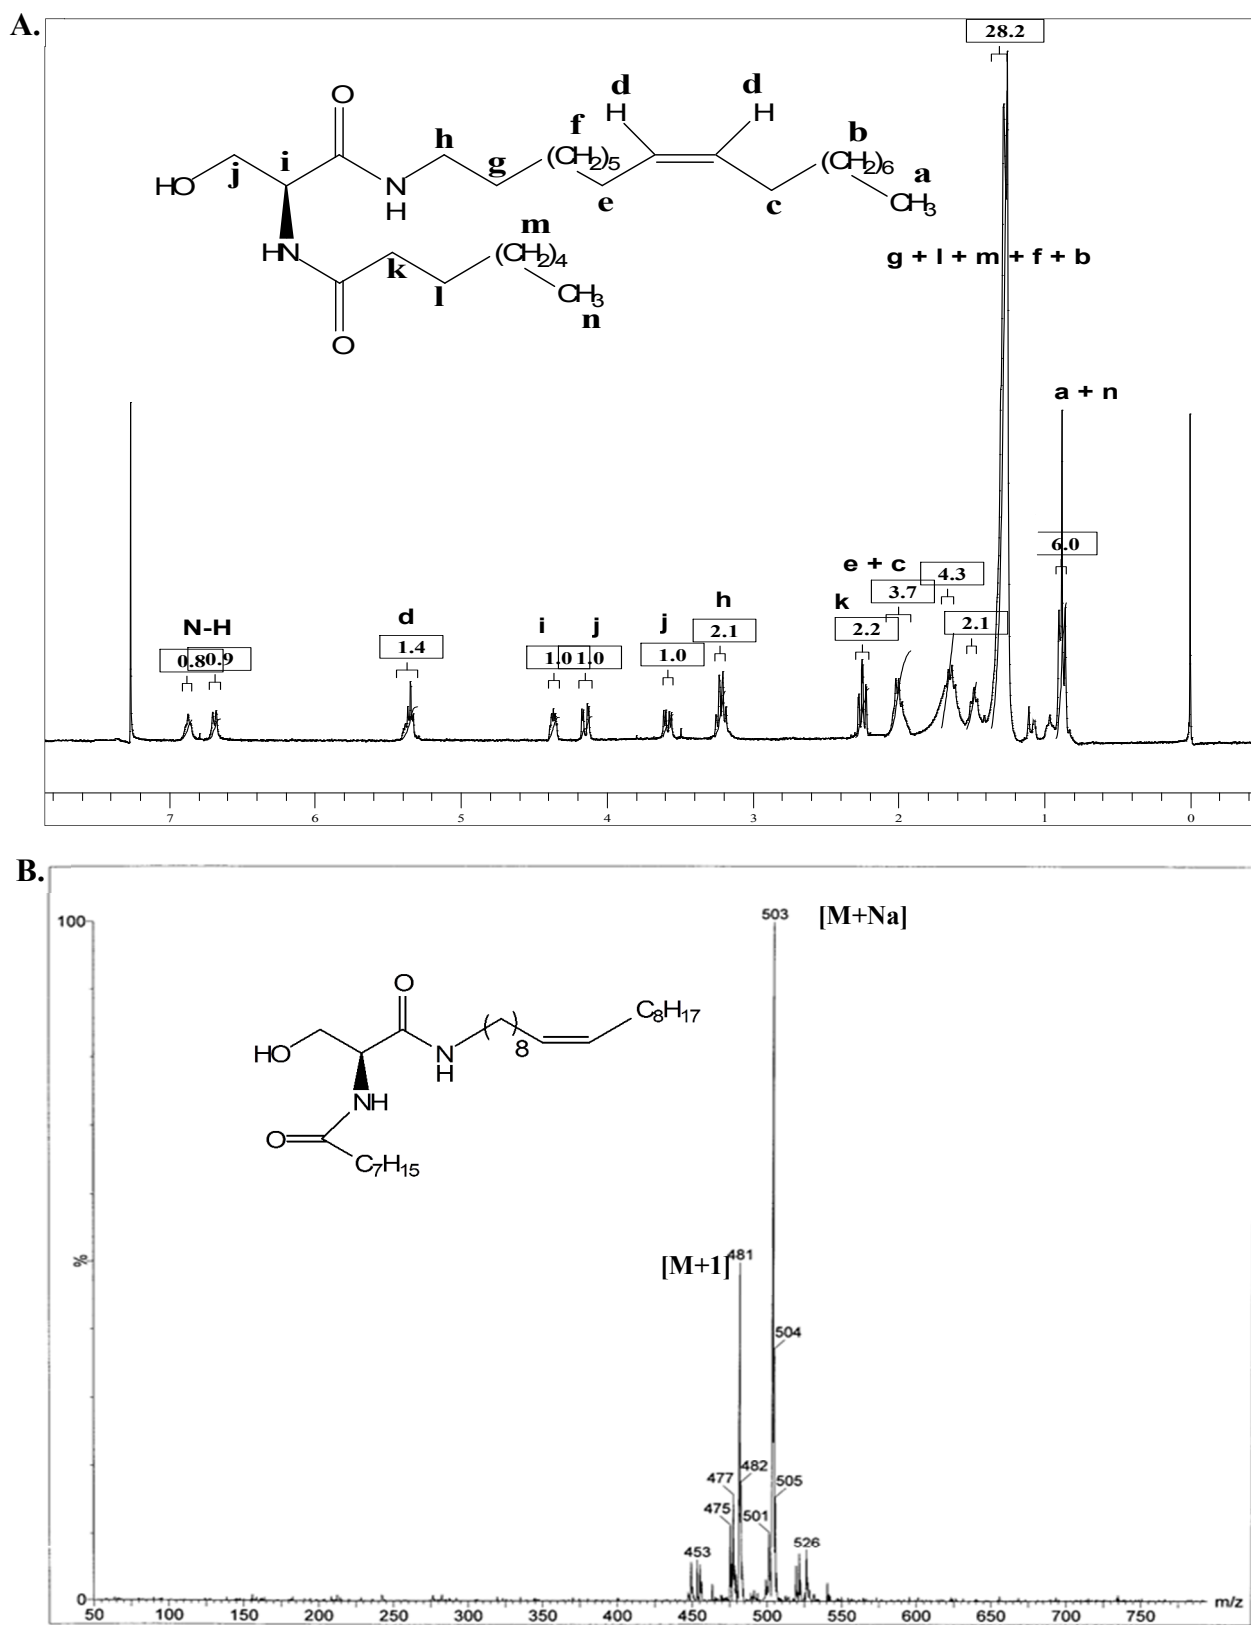

**Figure S6.**  $^1\text{H}$  NMR (**A**) and ESI-MS (**B**) of C18-oleyl.



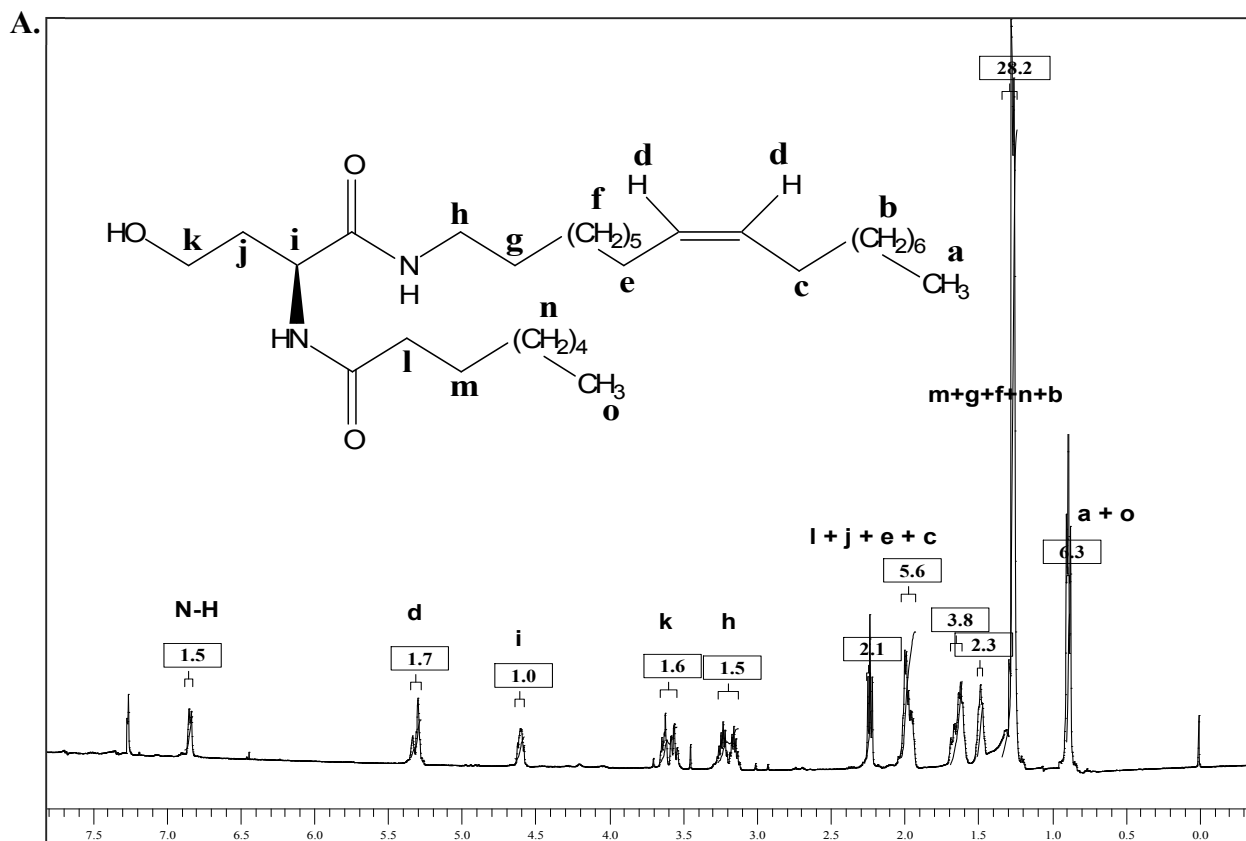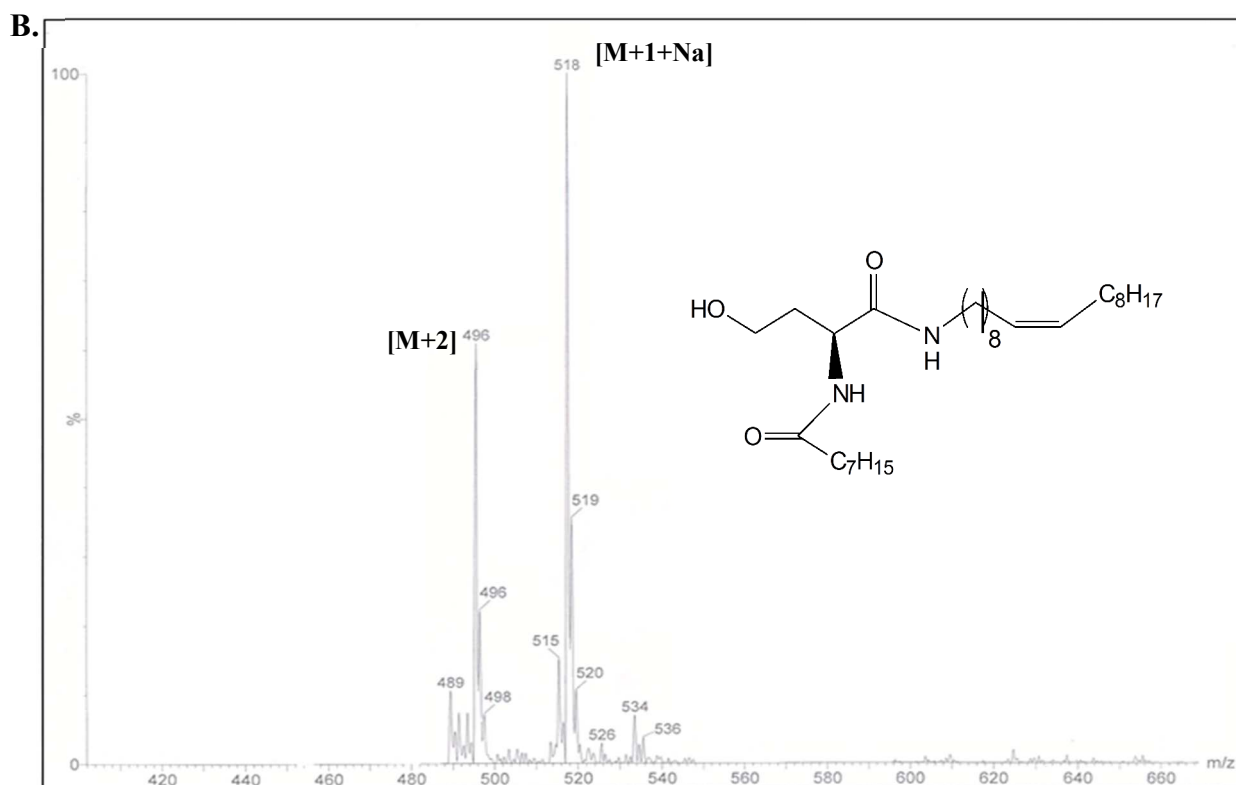

**Figure S7.** <sup>1</sup>H NMR (**A**) and ESIMS (**B**) of HC18-oleyl.

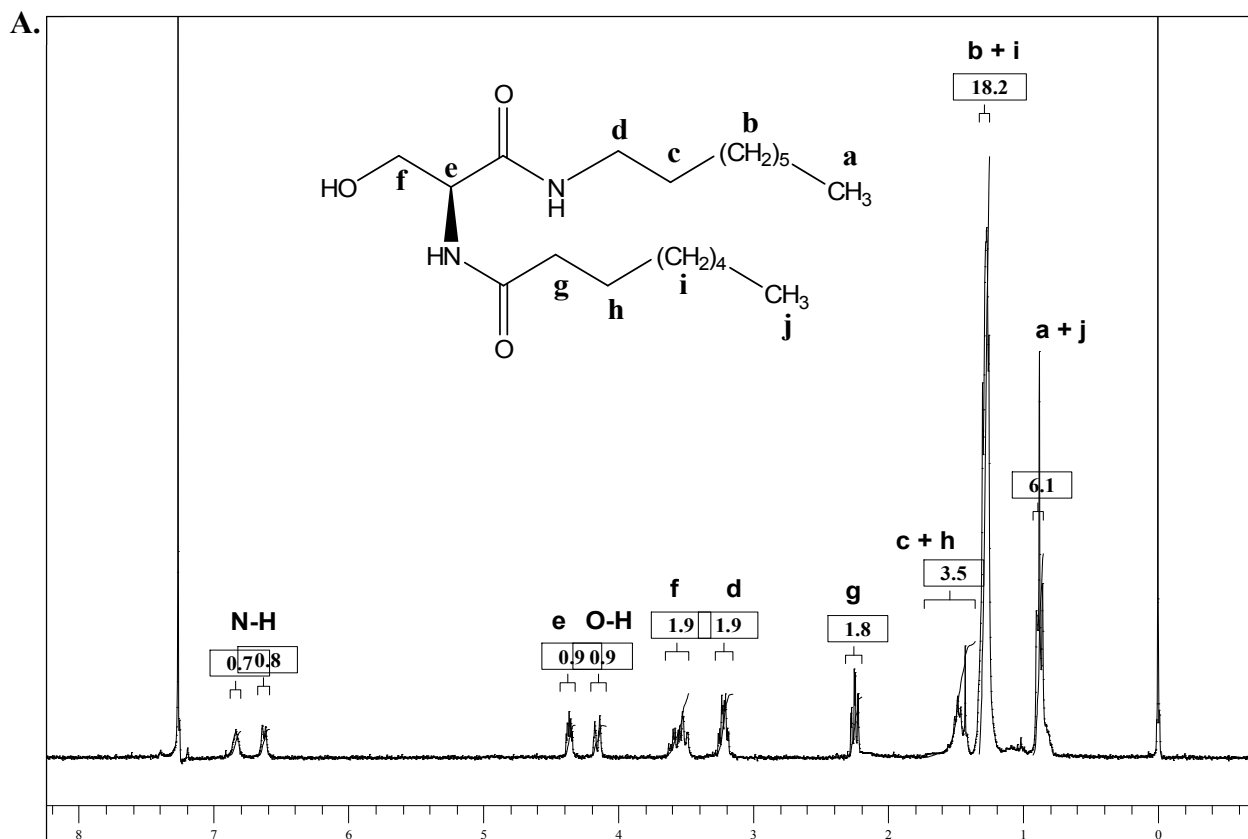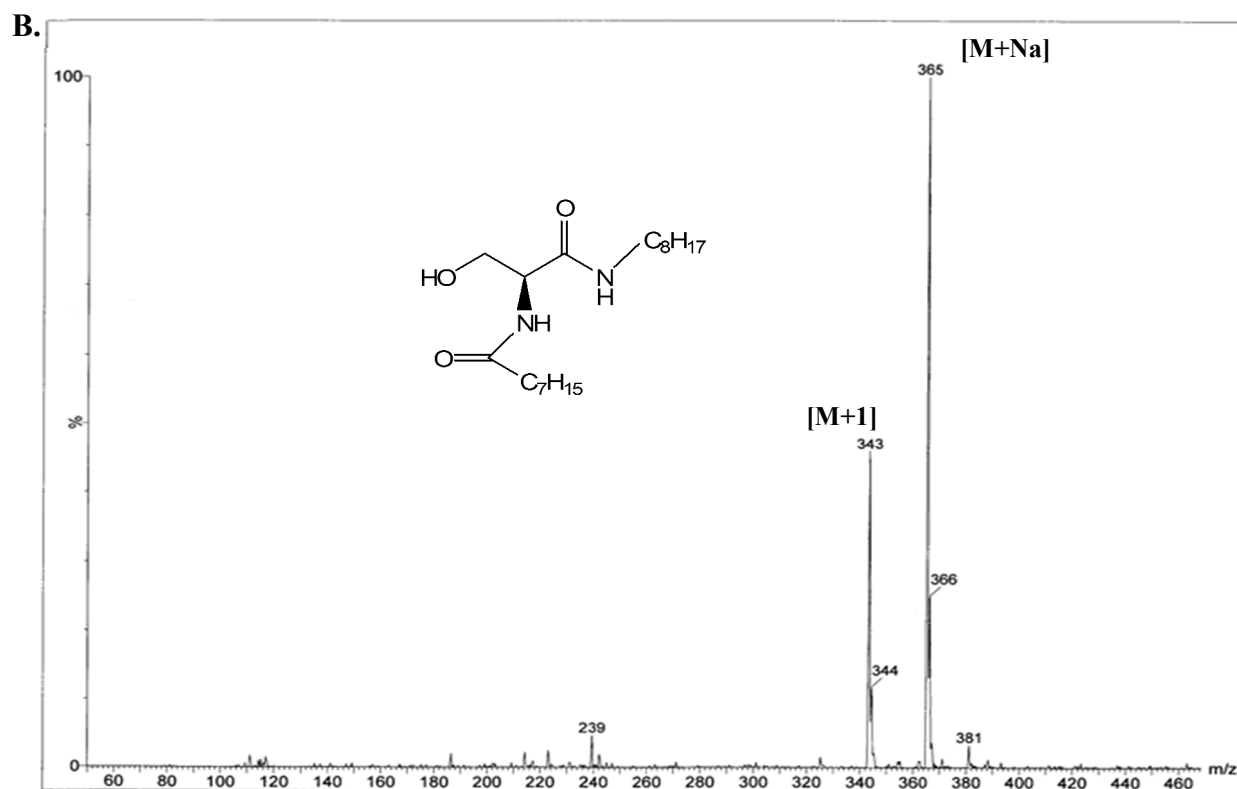

**Figure S8.**  $^1H$  NMR (A) and ESIMS (B) of **C8**.

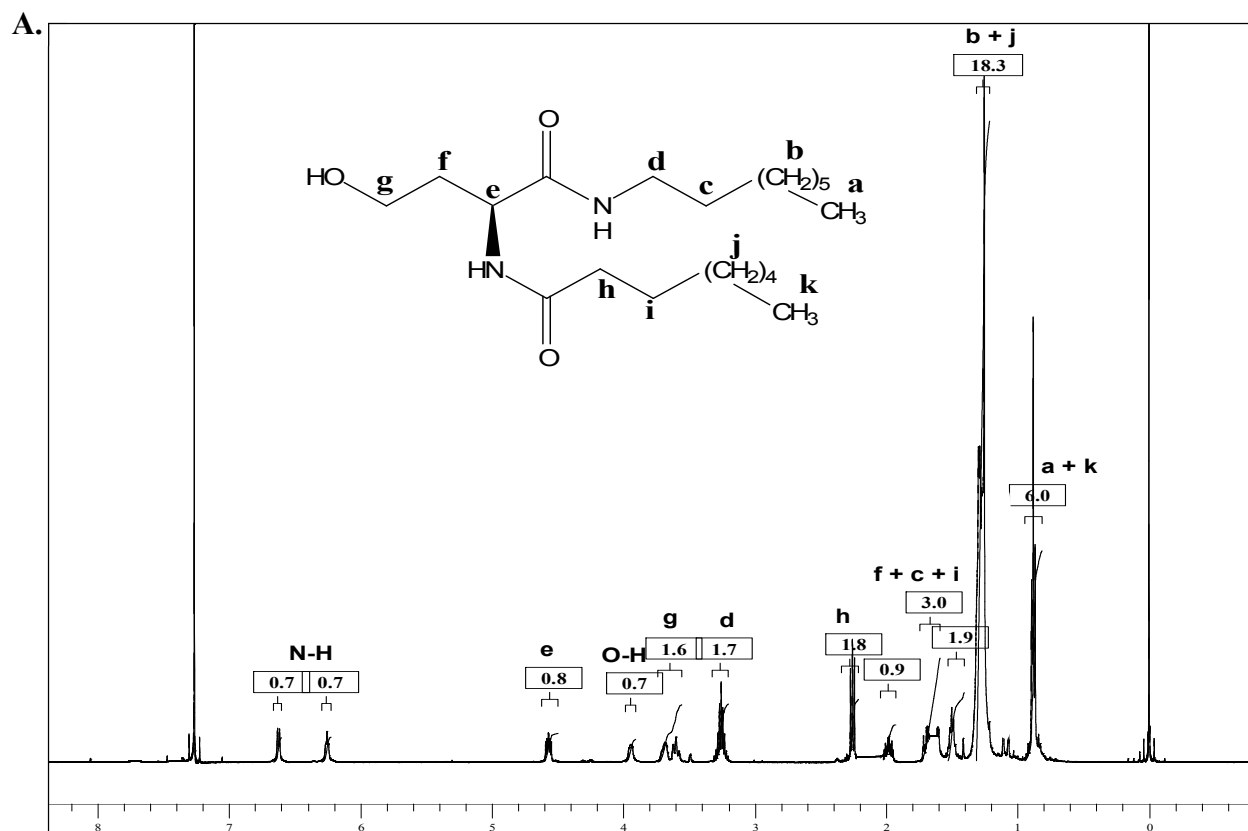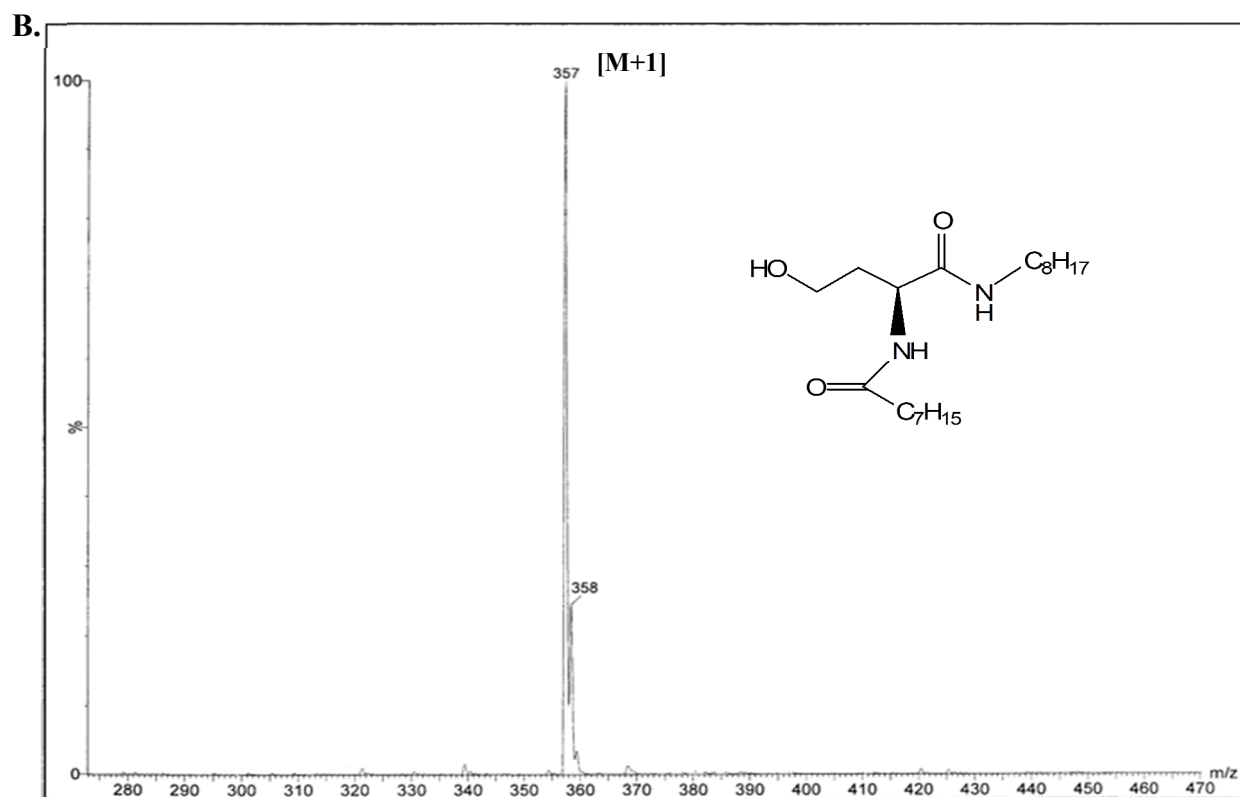

**Figure S9.** <sup>1</sup>H NMR (A) and ESIMS (B) of HC8.

A.

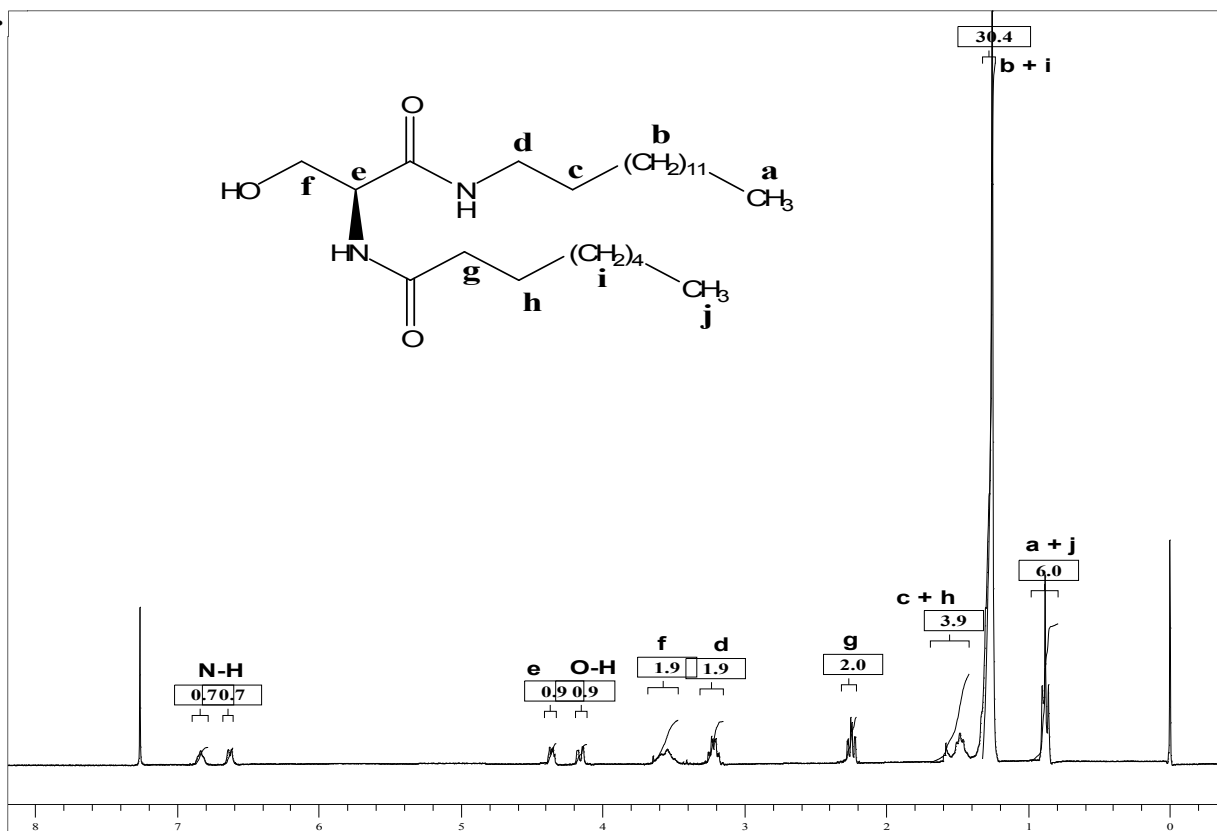

**B.**

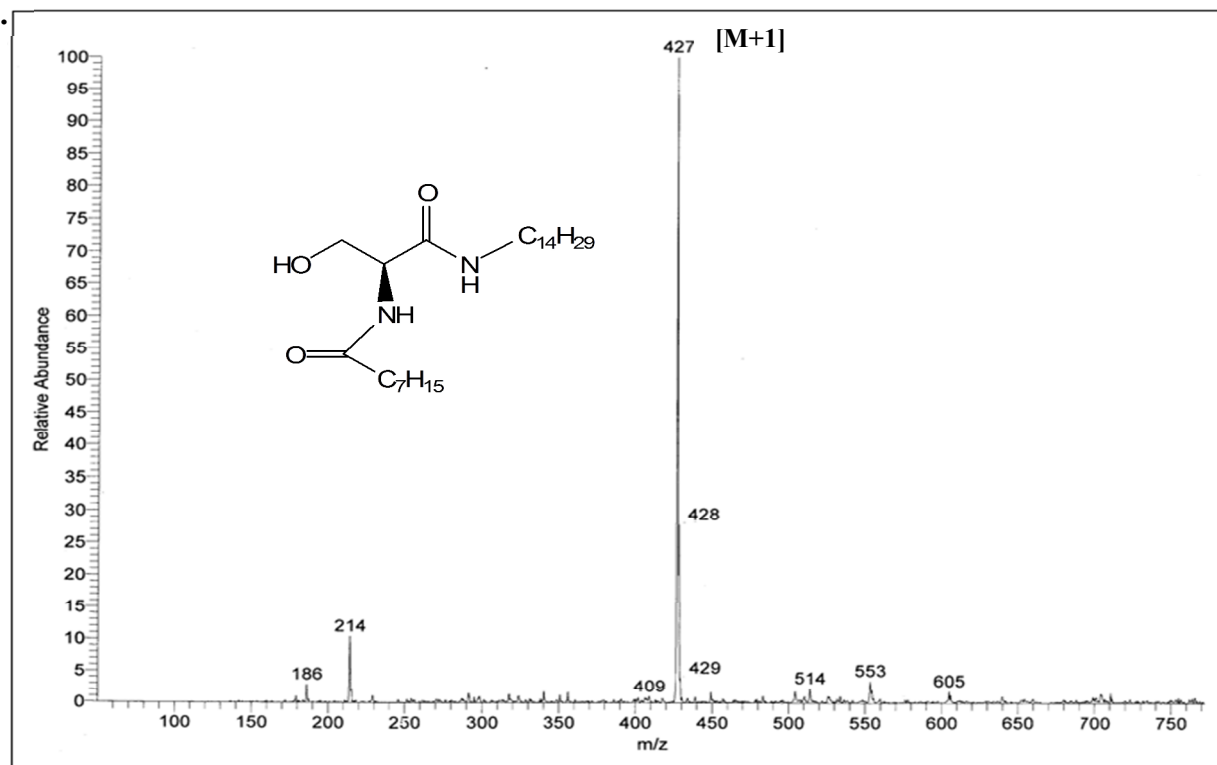

**Figure S10.**  $^1\text{H}$  NMR (A) and ESIMS (B) of C14.

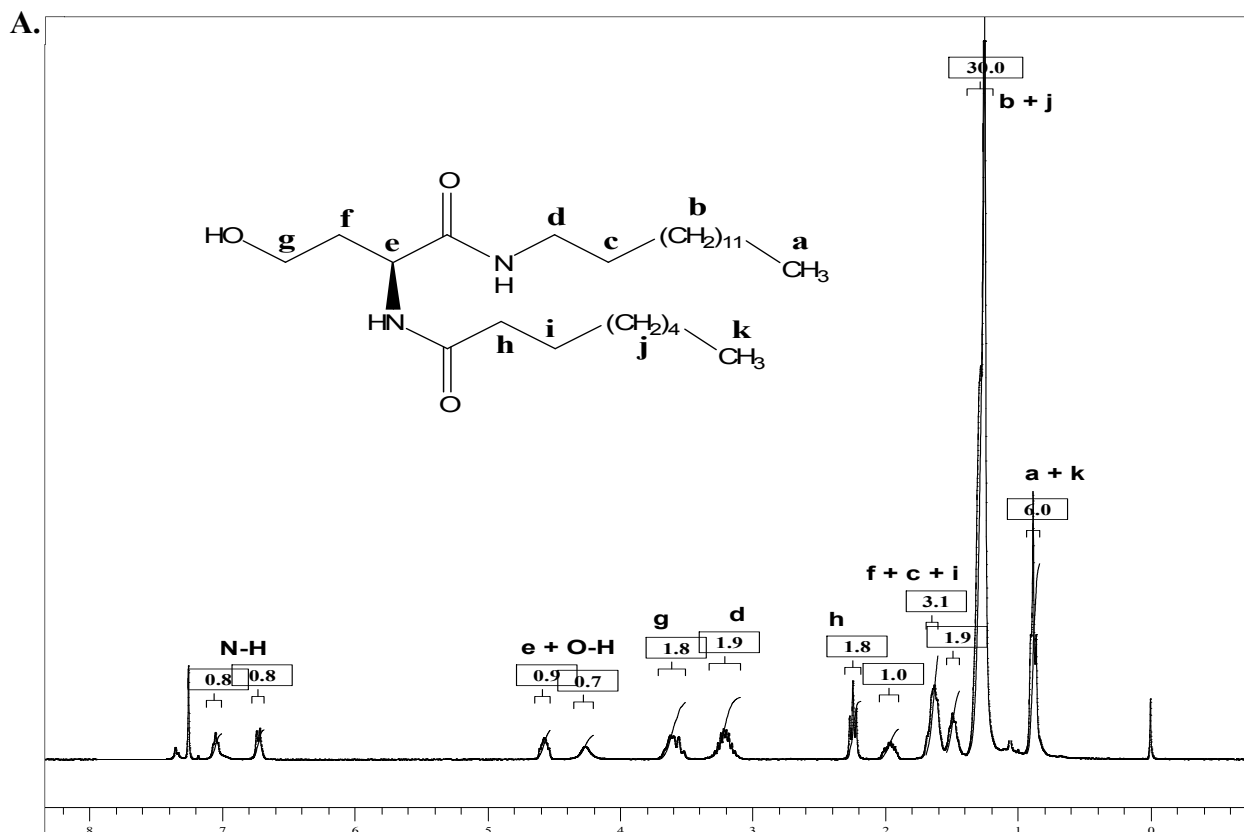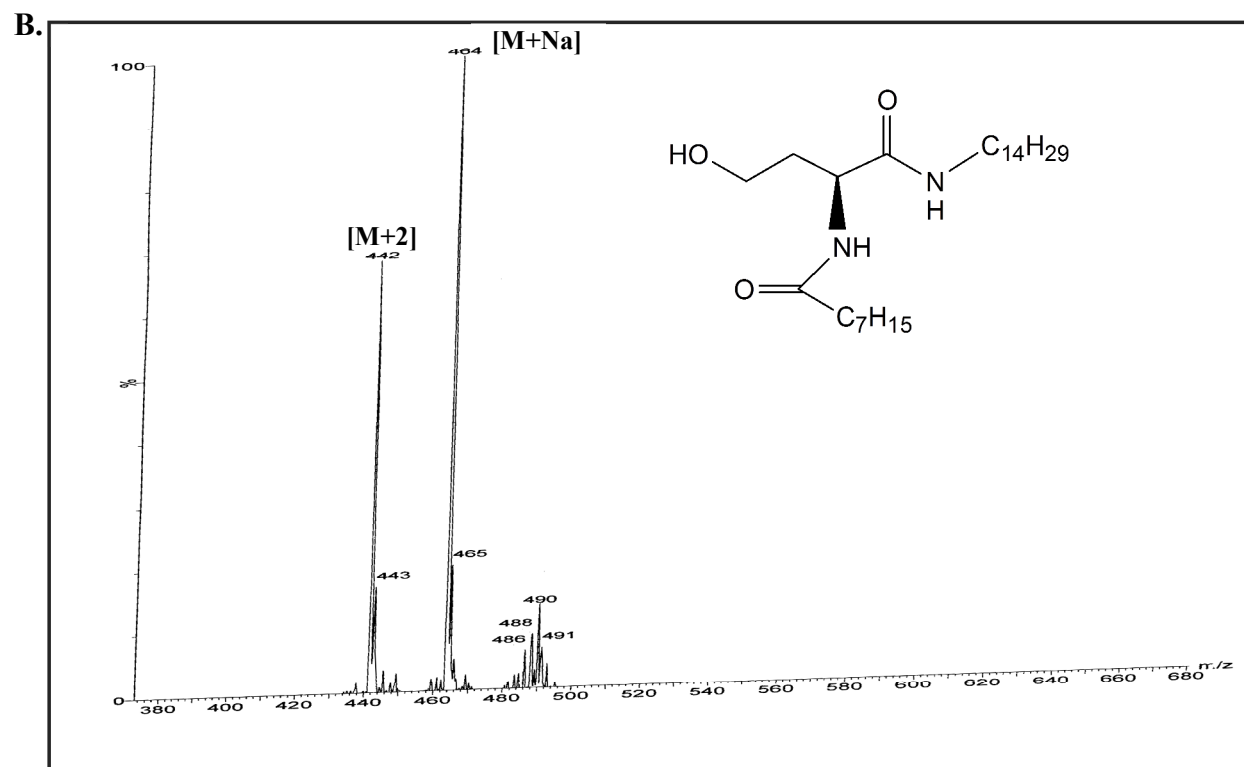

**Figure S11.** <sup>1</sup>H NMR (A) and ESIMS (B) of HC14.

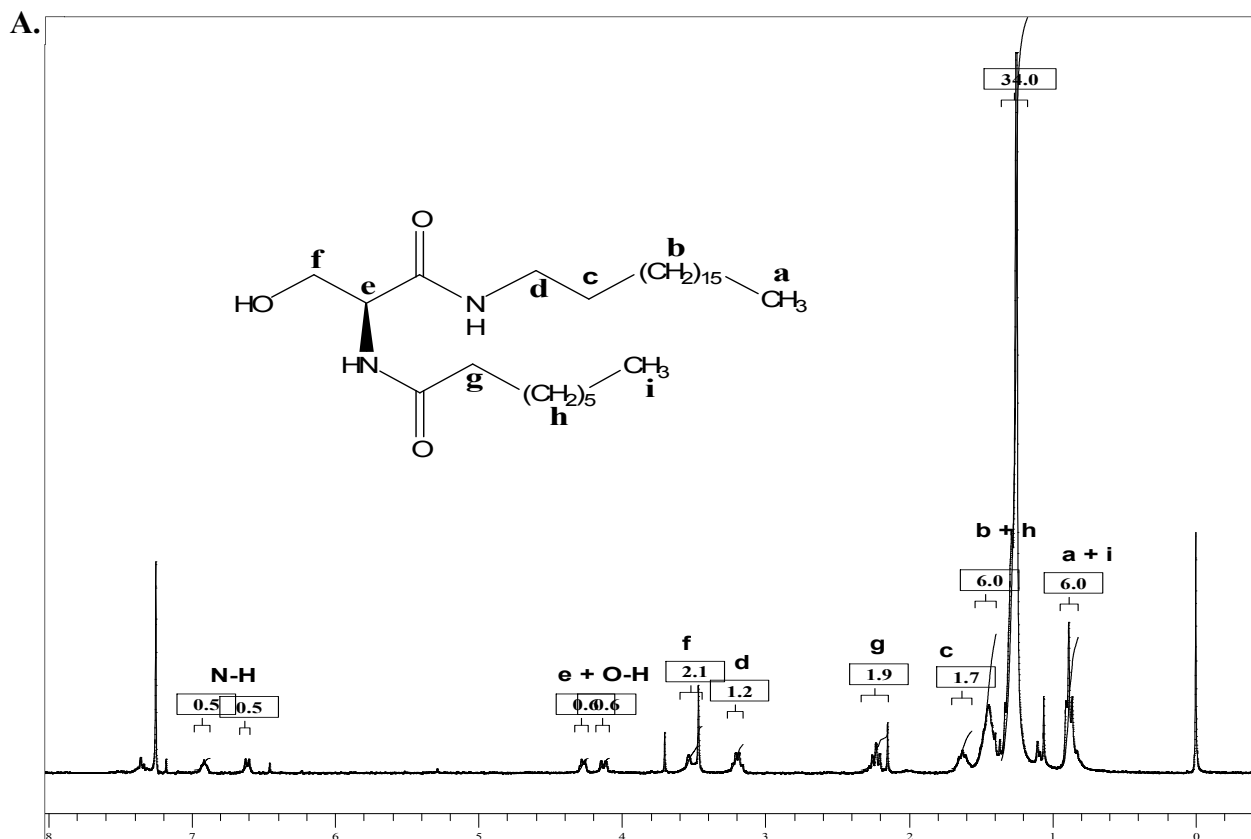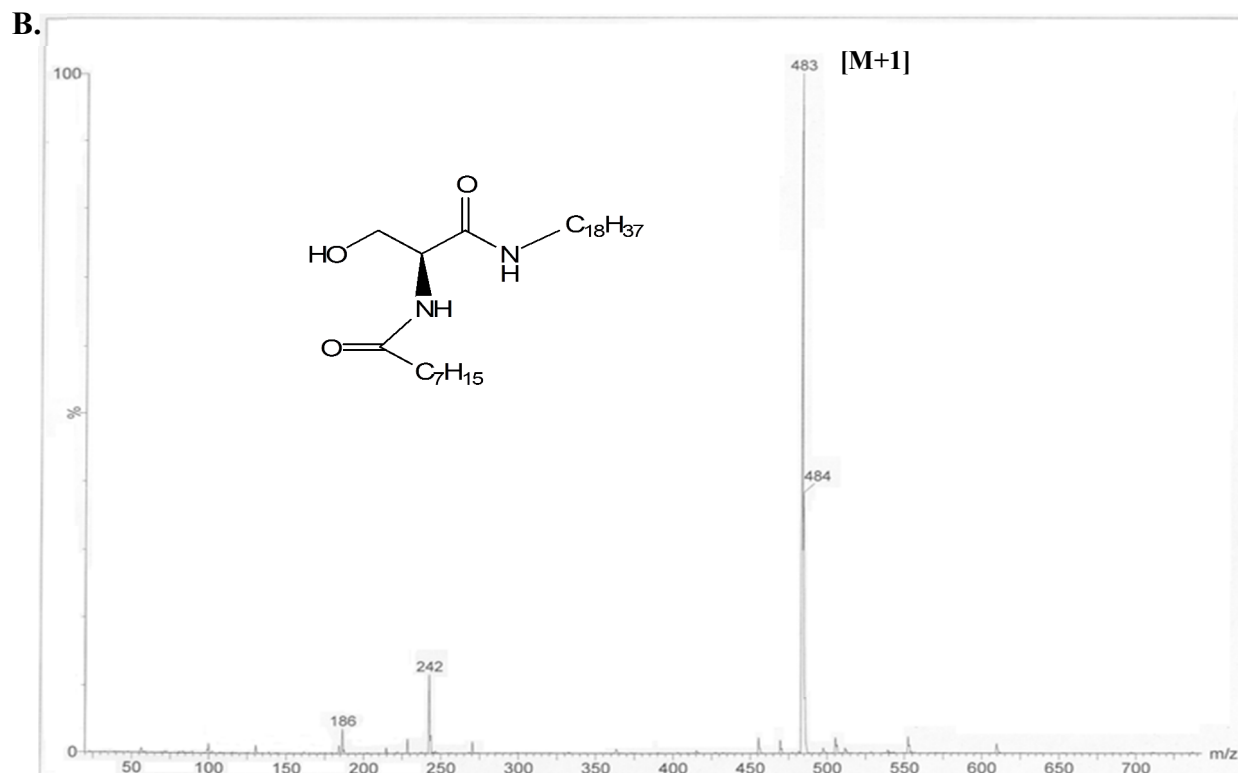

**Figure S12.** <sup>1</sup>H NMR (A) and ESIMS (B) of C18.

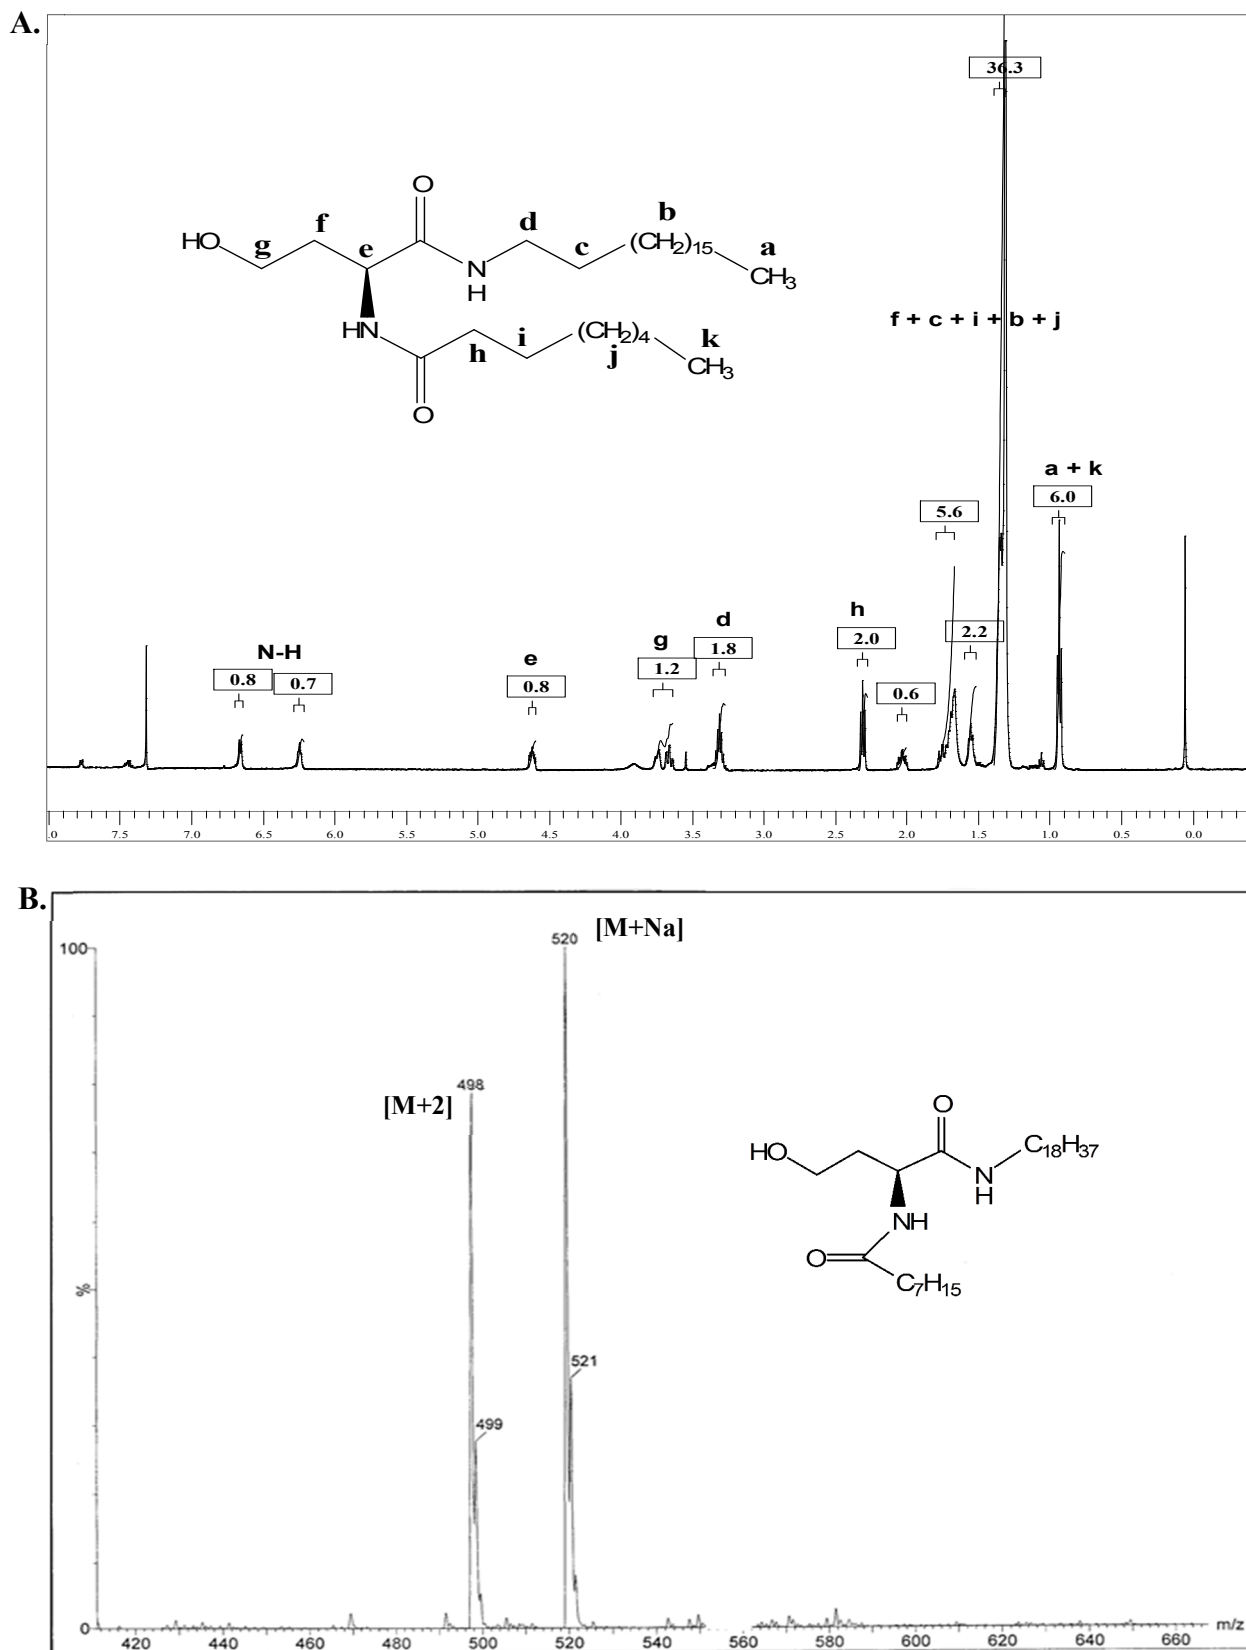

## HPLC Chromatogram of C18-oleyl

A.

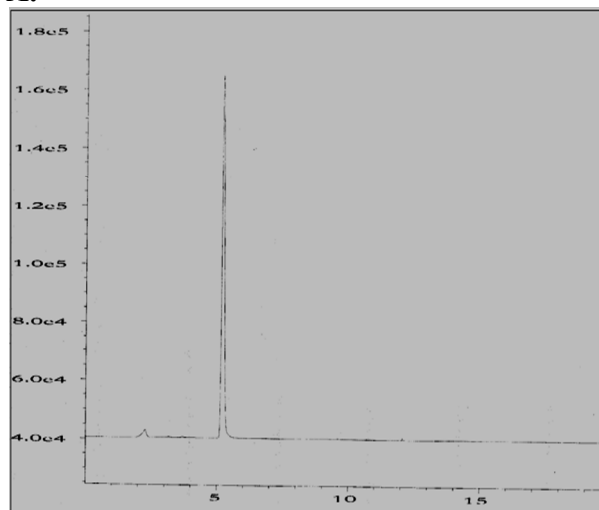

B.

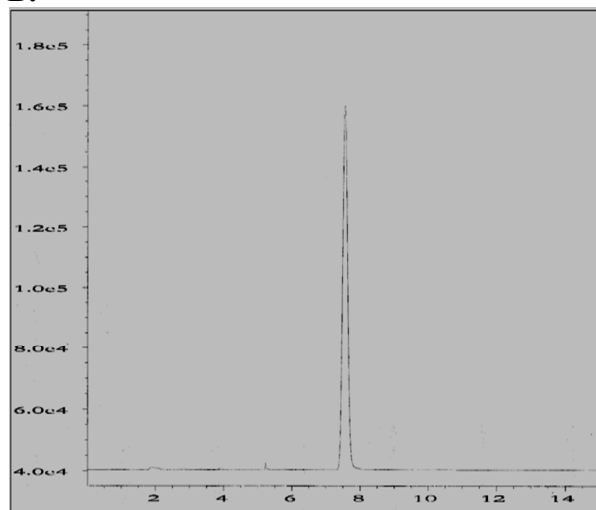

## HPLC Chromatogram of HC18-oleyl

A.

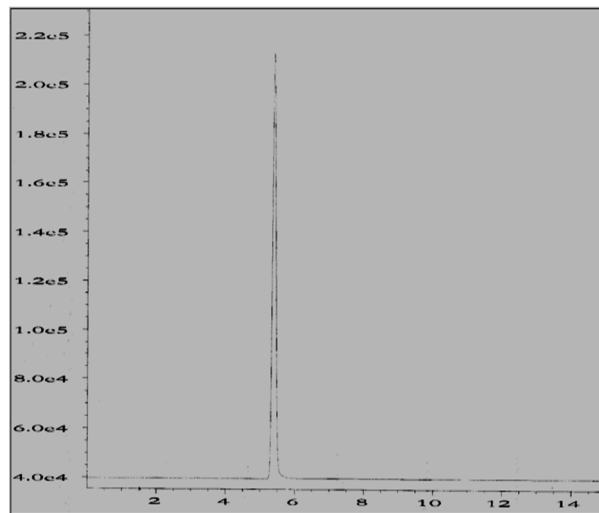

B.

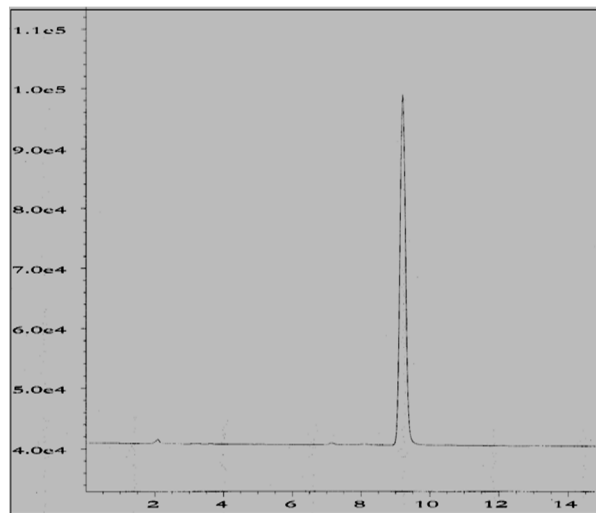



## HPLC Chromatogram of **C8**

**A.**

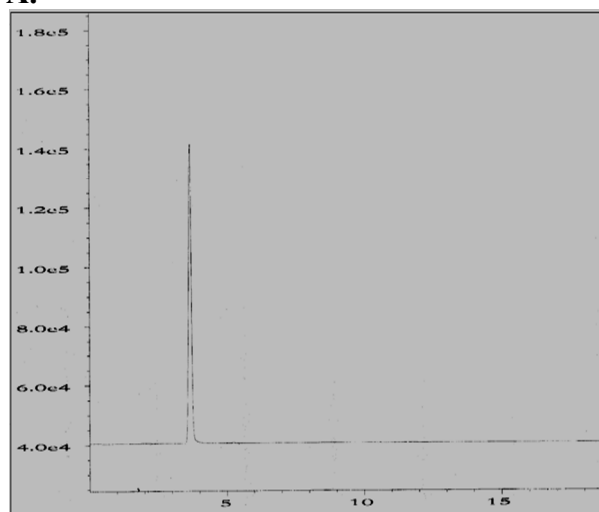

**B.**

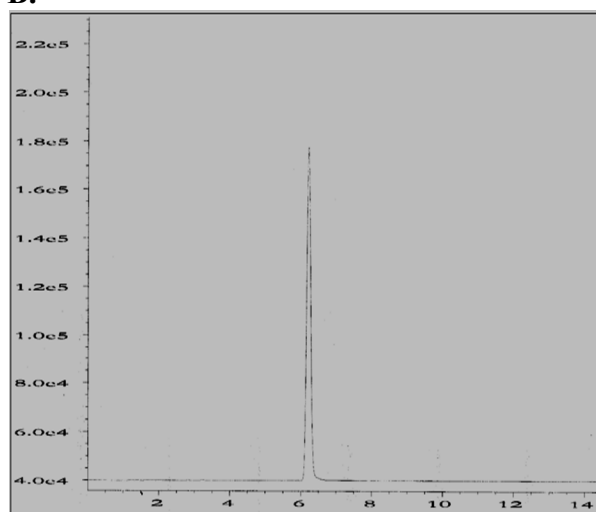

## HPLC Chromatogram of **HC8**

**A.**

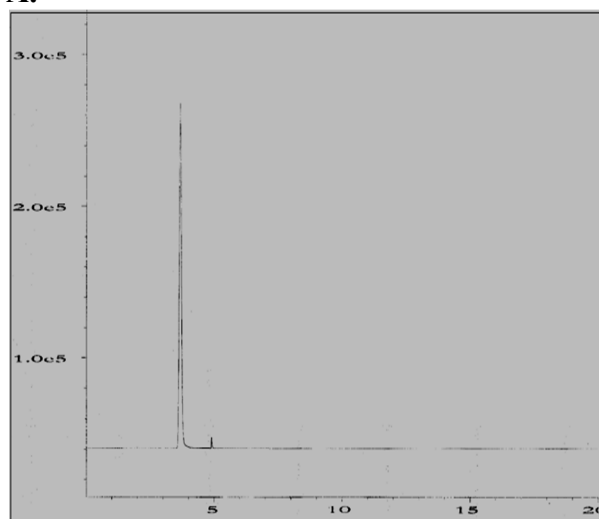

**B.**

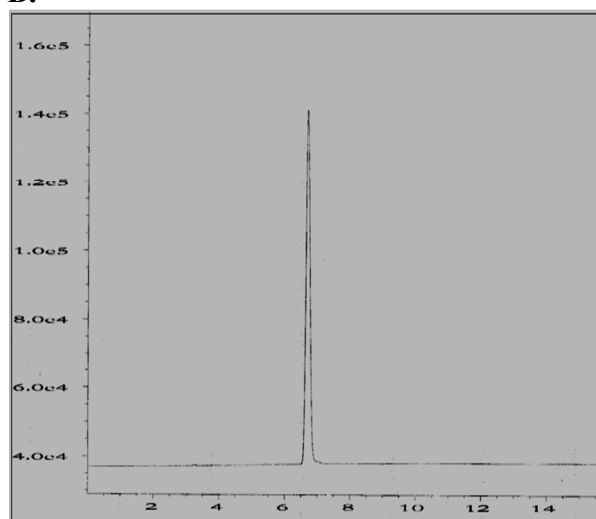

## HPLC Chromatogram of C14

A.

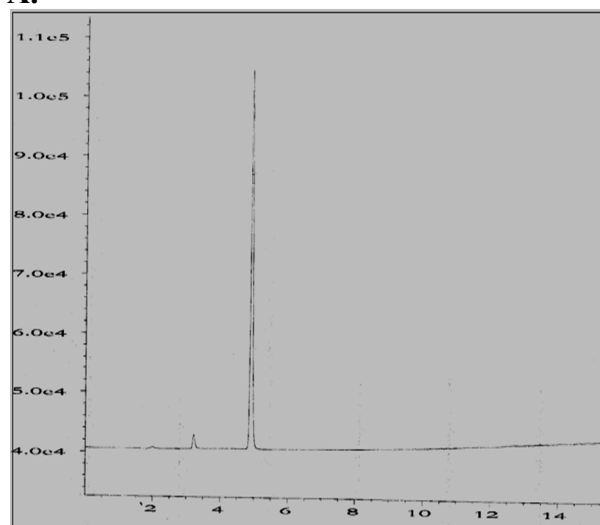

B.

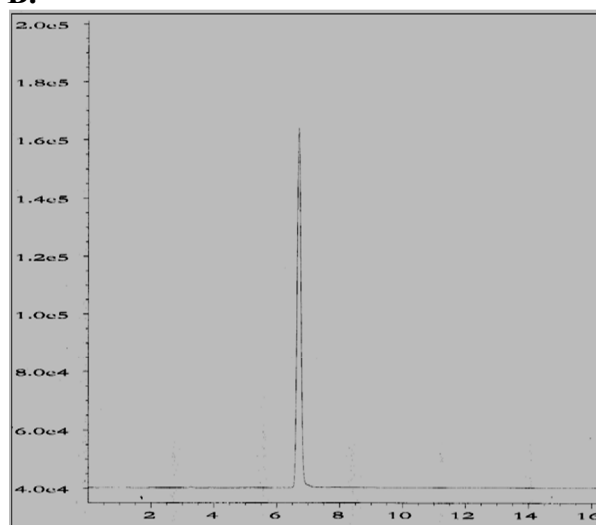

## HPLC Chromatogram of HC14

A.

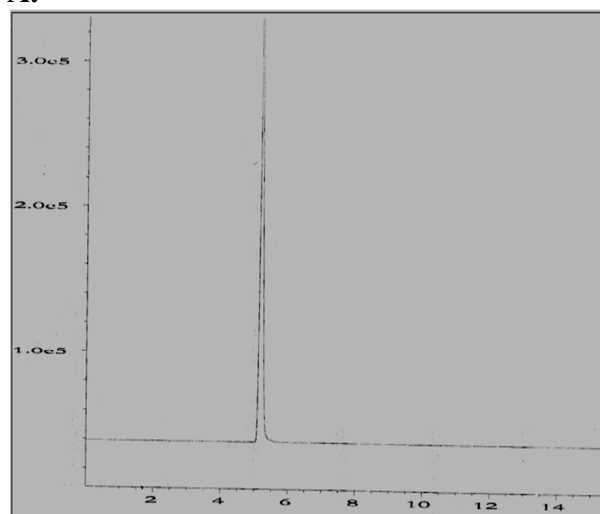

B.

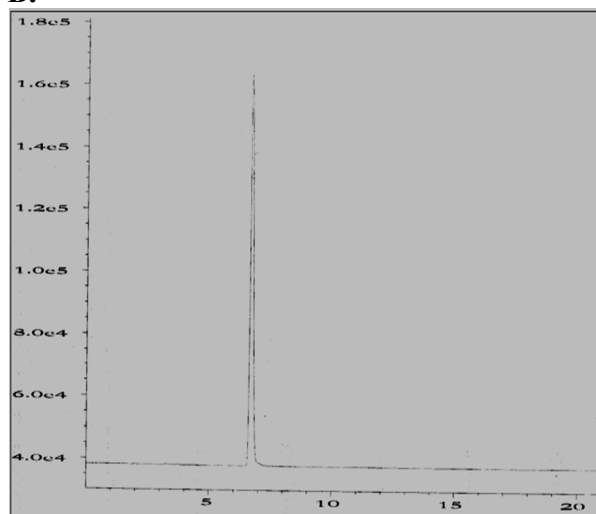

## HPLC Chromatogram of C18

**A.**

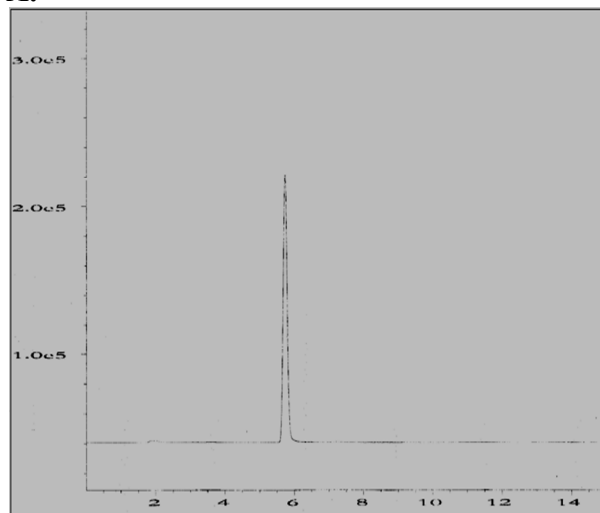

**B.**

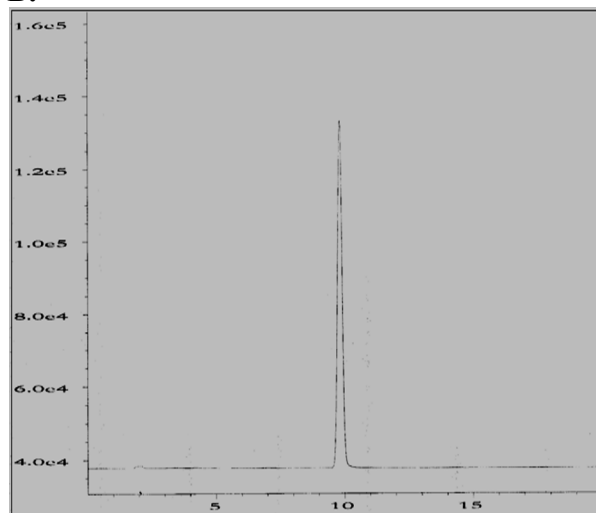

## HPLC Chromatogram of HC18

**A.**

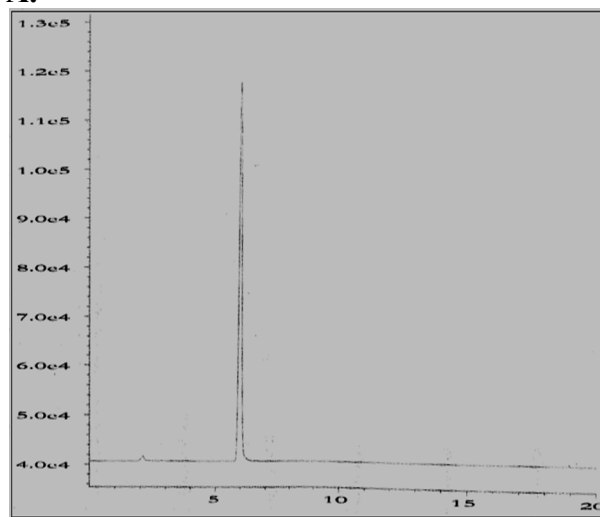

**B.**

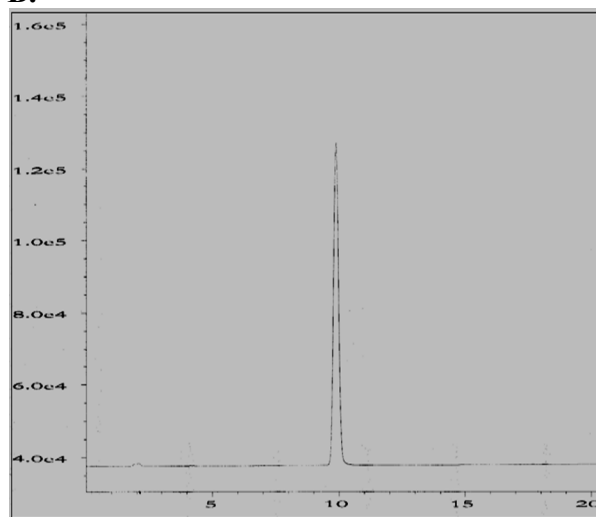

**Figure S14.** HPLC Chromatograms of synthesized ceramide analogs. Mobile Phase: Methanol (A); Methanol:Water, 95:5, v/v, (B). HPLC Conditions: System: Varian 1100 series, Column: Lichrospher® 100, RP-18e (5  $\mu$ m), Flow Rate: 1.0 mL/min (0-20 min), Typical Column Pressure: 60-65 Bars, Detection: UV at 210 nm.

**Table S1.** Sizes and Zeta potentials ( $\xi$ ) of Liposomes containing drugs

| <b>Drug entrapped in Liposome containing pegylated RGDGWK-lipopeptide 1</b> | <b>Hydrodynamic diameter(nm)</b> | <b>Zeta Potentials(mV)</b> |
|-----------------------------------------------------------------------------|----------------------------------|----------------------------|
| Curcumin                                                                    | 190 $\pm$ 5                      | 3.8 $\pm$ 1.7              |
| HC18-oleyl                                                                  | 196 $\pm$ 4                      | 3.9 $\pm$ 2.1              |
| Curcumin & HC18-oleyl                                                       | 208 $\pm$ 3                      | 4.2 $\pm$ 1.6              |
| C18-oleyl                                                                   | 194 $\pm$ 6                      | 3.7 $\pm$ 2.3              |
| Curcumin & C18-oleyl                                                        | 212 $\pm$ 5                      | 4.3 $\pm$ 1.7              |
| C8                                                                          | 189 $\pm$ 3                      | 3.2 $\pm$ 1.2              |
| Curcumin & C8                                                               | 199 $\pm$ 5                      | 3.8 $\pm$ 1.5              |
| HC8                                                                         | 191 $\pm$ 4                      | 3.5 $\pm$ 1.4              |
| Curcumin & HC8                                                              | 201 $\pm$ 6                      | 4.2 $\pm$ 2.1              |
| C14                                                                         | 196 $\pm$ 5                      | 3.7 $\pm$ 1.7              |
| Curcumin & C14                                                              | 215 $\pm$ 4                      | 3.9 $\pm$ 1.3              |
| HC14                                                                        | 198 $\pm$ 5                      | 3.5 $\pm$ 1.4              |
| Curcumin & HC14                                                             | 219 $\pm$ 5                      | 4.1 $\pm$ 1.7              |
| C18                                                                         | 197 $\pm$ 6                      | 3.3 $\pm$ 1.1              |
| Curcumin & C18                                                              | 211 $\pm$ 6                      | 3.9 $\pm$ 1.7              |
| HC18                                                                        | 195 $\pm$ 3                      | 3.5 $\pm$ 1.2              |
| Curcumin & HC18                                                             | 209 $\pm$ 5                      | 4.1 $\pm$ 1.9              |
| C8-cer                                                                      | 206 $\pm$ 5                      | 3.4 $\pm$ 3.1              |
| curcumin & C8-cer                                                           | 218 $\pm$ 2                      | 3.9 $\pm$ 1.8              |

**I.**

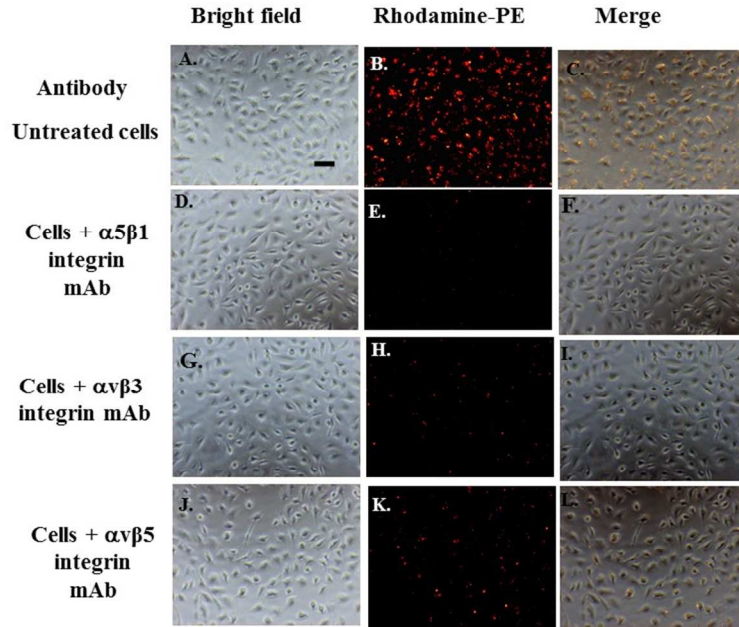

**II.**

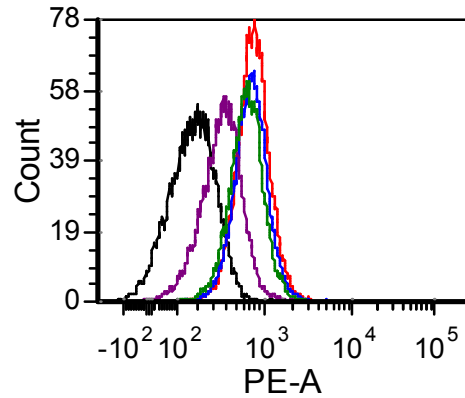

**Figure S15.** Liposomes of pegylated RGDGWK-lipopeptide **1** enter endothelial cells mainly via  $\alpha 5\beta 1$  integrin receptor. B16F10 cells were pre-saturated with monoclonal antibodies against  $\alpha 5\beta 1$ ,  $\alpha v\beta 3$  or  $\alpha v\beta 5$  integrins and then treated with Rh-PE (red) labeled liposomes of pegylated RGDGWK-lipopeptide **1** for 3 h. **I.** Epifluorescence microscopic images (Scale bar equals to 50  $\mu\text{m}$ ) were taken for cells without antibody treatment (**A-C**) as well as for cells pre-treated with mAbs against  $\alpha 5\beta 1$  integrins (**D-F**),  $\alpha v\beta 3$  integrins (**G-I**) and  $\alpha v\beta 5$  integrins (**J-L**). **II.** Flow

cytometric uptake analysis of Rh-PE labelled liposome in absence of any antibody (red) and in presence of monoclonal antibodies against  $\alpha 5\beta 1$  (violet),  $\alpha v\beta 3$  (green) or  $\alpha v\beta 5$  (blue) integrins compared to untreated cells (black). Data shown here are representative of two separate experiments.

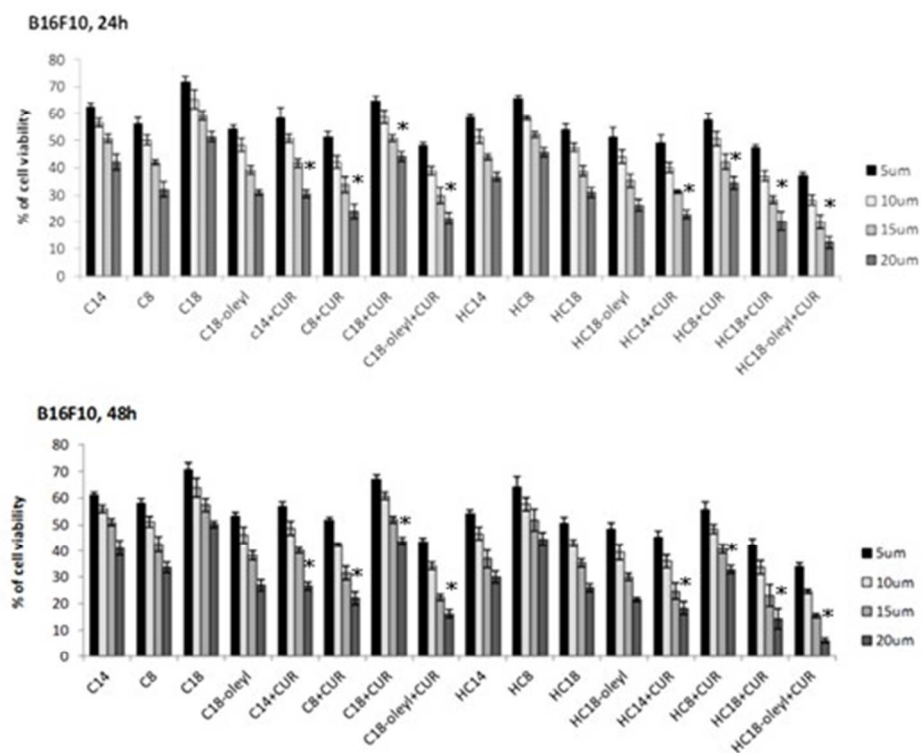

**Figure S16.** HC18-oleyl formulated in liposomes of pegylated RGDGWK-lipopeptide **1** is most potent cytotoxic agent among all the synthesized C8-ceramide analogs. B16F10 cells were treated with liposomal formulation of RGDGWK-lipopeptide **1** containing: ceramide analogs (5  $\mu$ M, 10  $\mu$ M, 15  $\mu$ M, 20  $\mu$ M) and both curcumin (2.5  $\mu$ M, 5  $\mu$ M, 7.5  $\mu$ M, 10  $\mu$ M) & ceramide analogs (2.5  $\mu$ M, 5  $\mu$ M, 7.5  $\mu$ M, 10  $\mu$ M). Relative cellular cytotoxicities of synthesized ceramide analogs either alone or in combination with curcumin were measured by MTT assay after 24 h and 48 h of treatment (\* $P < 0.005$  vs. individual ceramides at corresponding concentration).

A.

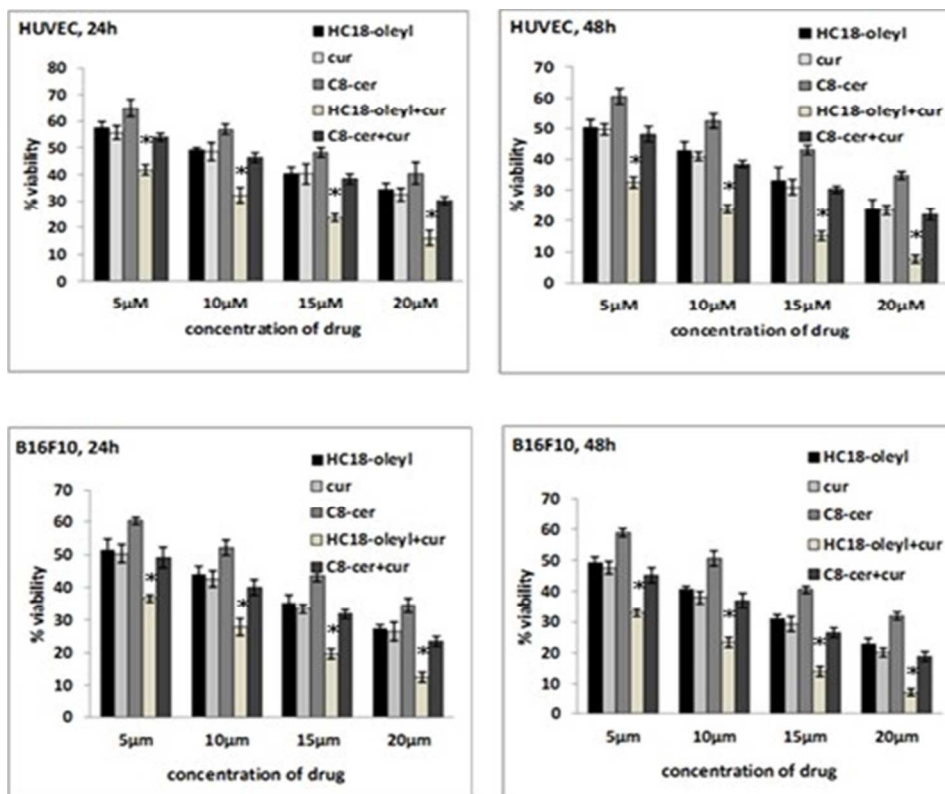

B.

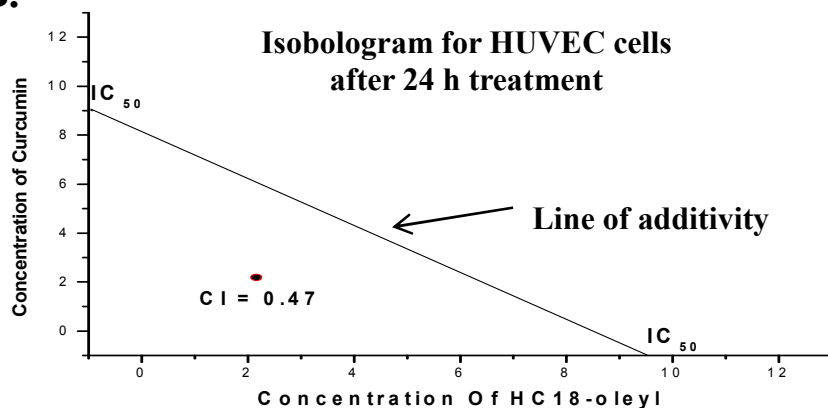

**Figure S17.** Curcumin and HC18-oleyl co-encapsulated in liposomes of pegylated RGDGWK-lipo peptide **1** show highest cytotoxicity in endothelial (HUVEC) and tumor (B16F10) cells in a dose dependent manner and work synergistically. **A.** HUVEC and B16F10 cells were treated with liposomally formulated: curcumin (5 μM, 10 μM, 15 μM, 20 μM), HC18-oleyl (5 μM, 10

$\mu\text{M}$ , 15  $\mu\text{M}$ , 20  $\mu\text{M}$ ), commercially available C8-cer (5  $\mu\text{M}$ , 10  $\mu\text{M}$ , 15  $\mu\text{M}$ , 20  $\mu\text{M}$ ), both HC18-oleyl (2.5  $\mu\text{M}$ , 5  $\mu\text{M}$ , 7.5  $\mu\text{M}$ , 10  $\mu\text{M}$ ) & curcumin (2.5  $\mu\text{M}$ , 5  $\mu\text{M}$ , 7.5  $\mu\text{M}$ , 10  $\mu\text{M}$ ) and both C8-cer (2.5  $\mu\text{M}$ , 5  $\mu\text{M}$ , 7.5  $\mu\text{M}$ , 10  $\mu\text{M}$ ) & curcumin (2.5  $\mu\text{M}$ , 5  $\mu\text{M}$ , 7.5  $\mu\text{M}$ , 10  $\mu\text{M}$ ). MTT assays were performed after 24 h and 48h of treatment (\* $P < 0.005$  vs. C8-cer at corresponding concentration). **B.** In isobologram for HUVEC cells after 24 h of treatment, combination index value (0.47) falls well below the line of additivity thereby showing synergistic actions of curcumin and HC18-oleyl encapsulated within the liposomes of pegylated RGDGWK-lipopeptide 1.

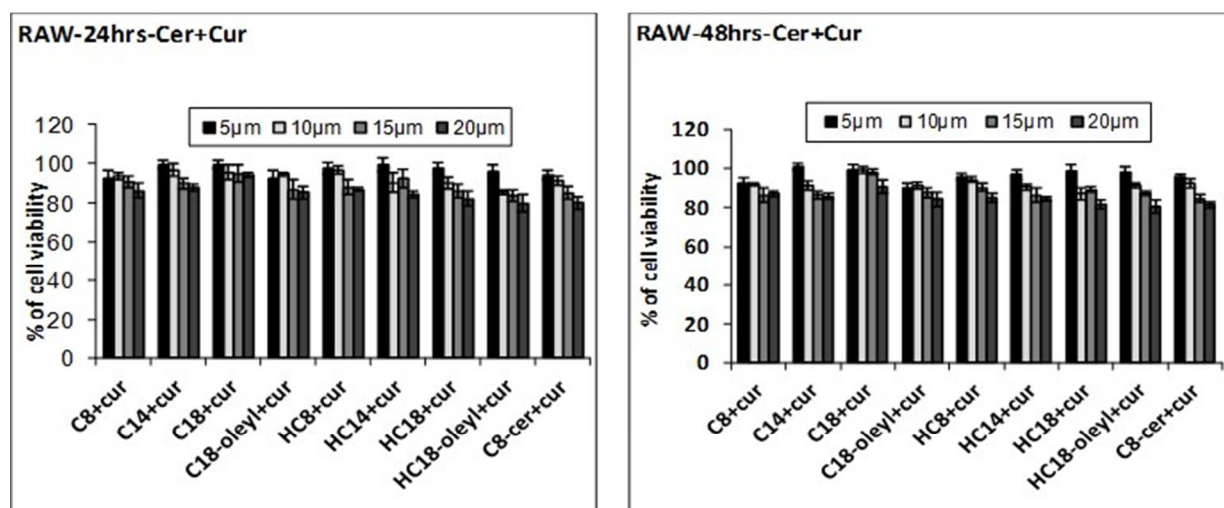

**Figure S18.** Curcumin and synthesized C8-ceramide analogs co-encapsulated in liposomes of pegylated RGDGWK-lipopeptide 1 show minimal cytotoxicity in non-cancerous (Raw) cell. Cells were treated with liposomes containing both curcumin (2.5  $\mu\text{M}$ , 5  $\mu\text{M}$ , 7.5  $\mu\text{M}$ , 10  $\mu\text{M}$ ) & ceramide analogs (2.5  $\mu\text{M}$ , 5  $\mu\text{M}$ , 7.5  $\mu\text{M}$ , 10  $\mu\text{M}$ ). MTT assays were performed after 24 h and 48h of treatment.



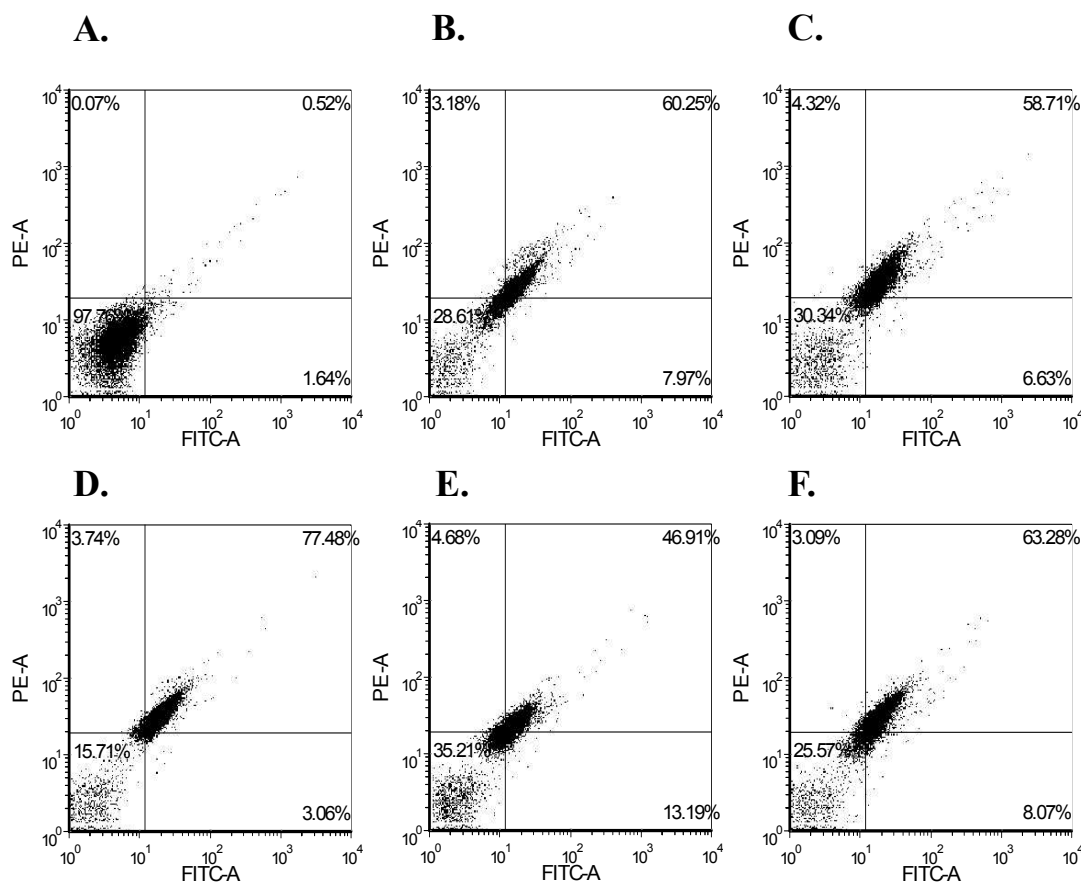

**Figure 19.** Liposomally bound curcumin & HC18-oleyl is more potent than liposomally bound curcumin & commercially available C8-cer in inducing apoptosis in B16F10 cells. Both untreated (A) and treated cells (B-F) were stained with FITC-Annexin V and propidium iodide (PI) for flow cytometric analysis of apoptosis. B16F10 cells were treated with liposomal formulations of pegylated RGDGWK-lipopeptide **1** containing: curcumin (B), HC18-oleyl (C), curcumin & HC18-oleyl (D), commercially available C8-cer (E), and curcumin & C8-cer (F) for 24 h. The horizontal and vertical axes represent cells labeled with FITC-Annexin V and PI respectively. Dots in the upper right quadrant represent late apoptotic population (positive for both annexin V and PI). Data shown here are representative of two separate experiments.

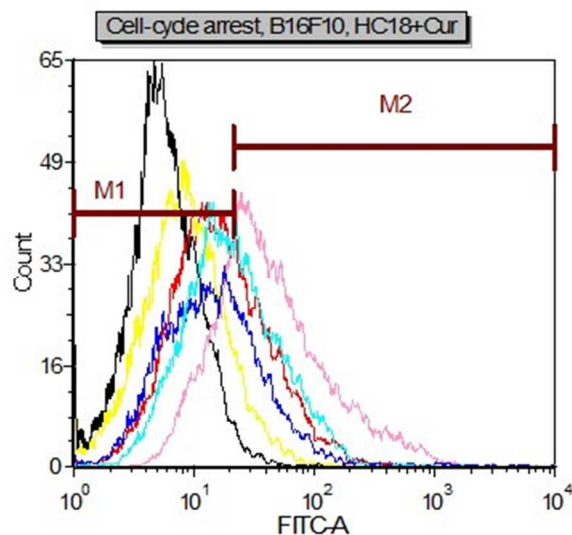

**Figure S20.** Treatment of B16F10 cells with liposomal formulations of pegylated RGDGWK-lipopeptide **1** containing both HC18-oleyl and curcumin leads to enhanced population of treated cells in G2/M phase. B16F10 cells synchronized at the G1/S boundary were released from the arrest and were treated with liposomal formulations of pegylated RGDGWK-lipopeptide

**1** containing: curcumin, HC18-oleyl, C8-cer, both curcumin & HC18-oleyl and both curcumin & C8-cer. After 24 h of treatment, cells were trypsinized, fixed, permeabilized, incubated with primary antibody of cyclin B1 (a marker of G2/M phase) followed by incubation with FITC-conjugated secondary antibody and finally analyzed by flow cytometry. Overlap of FACS profiles for the cyclin B1 for cells treated with liposomal formulation of: C8-cer (yellow profile), HC18-oleyl (blue profile), curcumin (red profile), both curcumin & C8-cer (sky blue profile), both curcumin & HC18-oleyl (pink profile) and untreated cells (black profile).

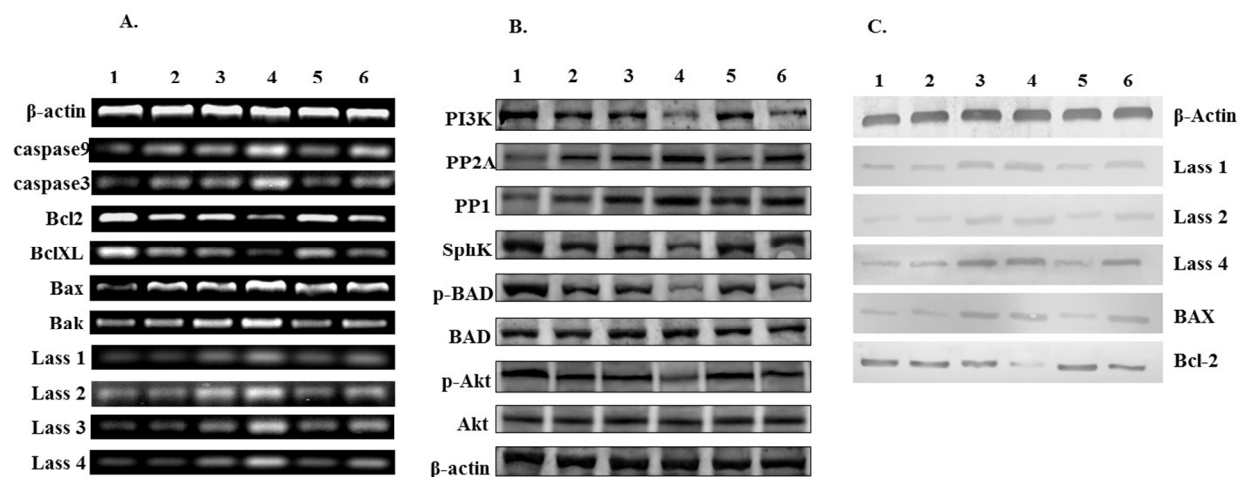

**Figure S21.** Liposomal formulations of curcumin & HC18-oleyl shows maximum effects in inhibiting expressions of proliferation and anti-apoptosis related genes in B16F10 cells at both mRNA and protein levels. mRNA levels (A) and protein expressions (B & C) of indicated genes involved in proliferation and apoptosis were measured by RT-PCR and Western blotting respectively. Lane 1, untreated cells; lane 2, cells treated with targeted liposomal HC18-oleyl; lane 3, cells treated with targeted liposomal curcumin; lane 4, cells treated with targeted liposome containing both curcumin & HC18-oleyl; lane 5, cells treated with targeted liposomal C8-cer; lane 6, cells treated with targeted liposome containing both curcumin & C8-cer

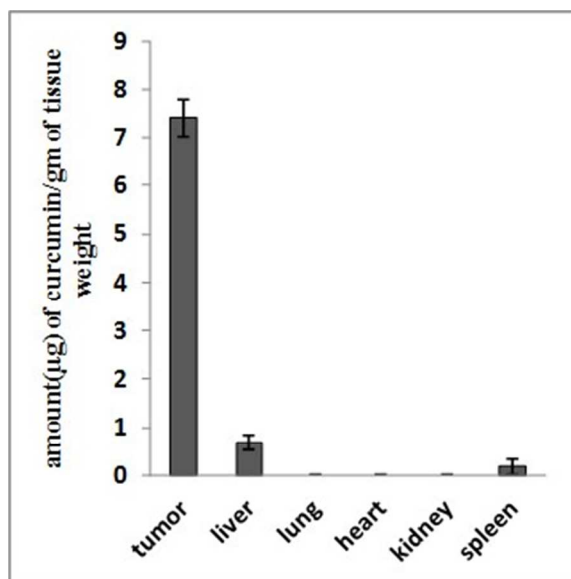

**Figure S22.** Intravenous administration of tumor vasculature targeting liposome of pegylated RGDGWK-lipopeptide **1** containing curcumin selectively accumulates to tumor tissue after 24 h.

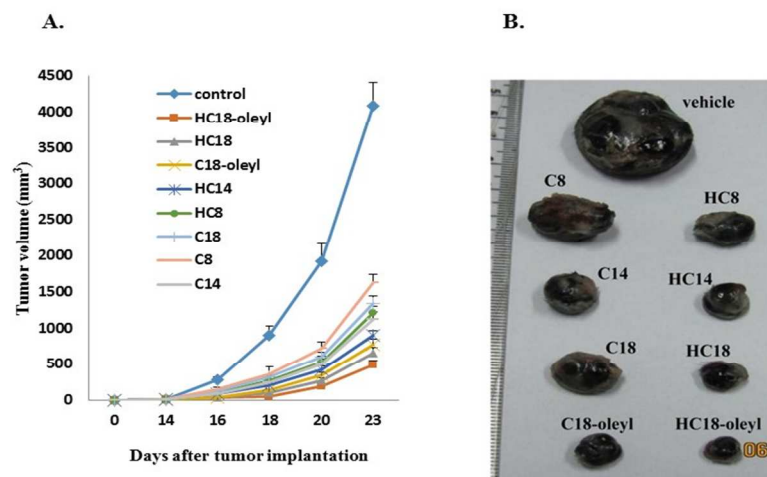

**Figure S23.** Among all the synthesized ceramide analogs HC18-oleyl is most potent to inhibit tumor growth. **A.** Relative tumor growth inhibition upon i.v. injected with liposomal formulations containing synthesized C8-ceramide analogs. **B.** Representative tumor sizes in each group on day 25 post tumor inoculation.

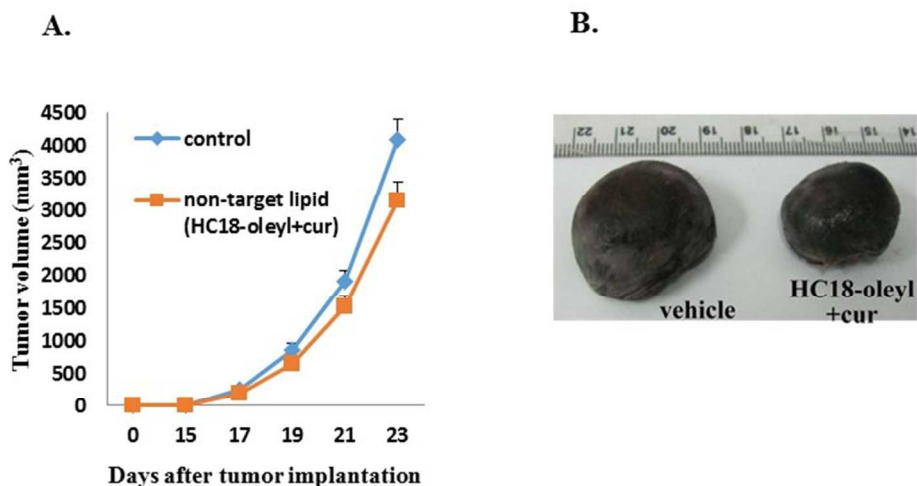

**Figure S24.** HC18-oleyl & curcumin formulated in non-targeting control liposomes of pegylated RGELFK-lipopeptide **2** inhibit tumor growth to a lesser extent. **A.** Tumor growth inhibition properties of non-targeted liposomal formulation containing both HC18-oleyl & curcumin. **B.** Representative tumor sizes in each group on day 25 post tumor inoculation.
